# Supplementary material
Source: Research Square preprint supplement (doi:10.21203/rs.3.rs-9524528/v1)
Supplement: Supplementary file 1 [file 0072605f6f79378efab468d1.pdf]

## Supplementary experimental data

**Table ST1:** Antioxidant activity of the methanolic extract of *H. fomes* leaves (MEHFL) in DPPH free radical scavenging assay.

| Group         | Concentration (µg/mL) | % Inhibition | IC <sub>50</sub> (µg/mL) | p-value |
|---------------|-----------------------|--------------|--------------------------|---------|
| MEHFL         | 20                    | 49.86 ± 0.03 | 21.98 ± 1.19             | ≈ 0.0   |
|               | 40                    | 60.48 ± 0.06 |                          |         |
|               | 60                    | 65.33 ± 0.06 |                          |         |
|               | 80                    | 73.31 ± 0.04 |                          |         |
|               | 100                   | 79.80 ± 0.04 |                          |         |
|               | 200                   | 85.77 ± 0.04 |                          |         |
| Ascorbic acid | 20                    | 32.47 ± 2.00 | 59.58 ± 2.06             |         |
|               | 40                    | 42.13 ± 0.13 |                          |         |
|               | 60                    | 49.13 ± 0.22 |                          |         |
|               | 80                    | 55.47 ± 0.06 |                          |         |
|               | 100                   | 62.40 ± 0.16 |                          |         |
|               | 200                   | 66.84 ± 0.13 |                          |         |

% Inhibition =  $\frac{(Absorbance_{Negative\ control} - Absorbance_{Test\ sample})}{(Absorbance_{Negative\ control})} \times 100\%$ ; the negative control contained

all reagents except the extract or ascorbic acid, while the test sample consisted of the reaction mixture containing either MEHFL or ascorbic acid. Results are expressed as mean ± SEM (n = 3).

**Table ST2:** Ferricyanide reducing power of the methanolic extract of *H. fomes* leaves (MEHFL).

| Group         | Concentration (µg/mL) | Absorbance (At 700 nm) | p-value |
|---------------|-----------------------|------------------------|---------|
| MEHFL         | 12.5                  | 0.49 ± 0.001           | ≈ 0.0   |
|               | 25                    | 0.59 ± 0.001           |         |
|               | 50                    | 0.63 ± 0.002           |         |
|               | 100                   | 0.94 ± 0.001           |         |
|               | 200                   | 1.09 ± 0.002           |         |
|               | 400                   | 1.29 ± 0.002           |         |
| Ascorbic acid | 12.5                  | 0.07 ± 0.001           |         |
|               | 25                    | 0.10 ± 0.002           |         |
|               | 50                    | 0.19 ± 0.002           |         |
|               | 100                   | 0.26 ± 0.001           |         |
|               | 200                   | 0.36 ± 0.003           |         |
|               | 400                   | 0.44 ± 0.001           |         |

Results are expressed as mean ± SEM (n = 3).

**Table ST3:** Anti-inflammatory activity of the methanolic extract of *H. fomes* leaves (MEHFL) in bovine serum albumin (BSA) denaturation assay.

| Group | Concentration (µg/mL) | % Inhibition | IC <sub>50</sub> (µg/mL) | p-value |
|-------|-----------------------|--------------|--------------------------|---------|
| MEHFL | 12.5                  | 8.02 ± 0.61  | 966.61 ± 0.45            | ≈ 0.0   |
|       | 25                    | 18.51 ± 3.85 |                          |         |
|       | 50                    | 38.27 ± 2.22 |                          |         |
|       | 100                   | 50.61 ± 1.23 |                          |         |
|       | 200                   | 73.45 ± 2.69 |                          |         |
|       | 400                   | 91.35 ± 2.22 |                          |         |
|       | Aspirin               | 12.5         |                          |         |
| 25    |                       | 13.58 ± 1.63 |                          |         |
| 50    |                       | 16.66 ± 1.06 |                          |         |
| 100   |                       | 37.65 ± 2.69 |                          |         |
| 200   |                       | 54.32 ± 4.82 |                          |         |
| 400   |                       | 77.77 ± 1.85 |                          |         |

% Inhibition =  $\frac{(Absorbance_{Test\ sample} - Absorbance_{Negative\ control})}{(Absorbance_{Negative\ control})} \times 100\ %$ ; the negative control contained

all reagents except the extract or aspirin, while the test sample consisted of the reaction mixture containing either MEHFL or aspirin. Results are expressed as mean ± SEM (n = 3).

**Table ST4:** Egg albumin denaturation activity of the methanolic extract of *H. fomes* leaves (MEHFL) in egg albumin denaturation assay.

| Group | Concentration (µg/mL) | % Inhibition | IC <sub>50</sub> (µg/mL) | p-value |
|-------|-----------------------|--------------|--------------------------|---------|
| MEHFL | 12.5                  | 9.59 ± 2.20  | 834.85 ± 0.52            | ≈ 0.0   |
|       | 25                    | 22.72 ± 1.51 |                          |         |
|       | 50                    | 39.89 ± 2.81 |                          |         |
|       | 100                   | 55.05 ± 2.02 |                          |         |
|       | 200                   | 68.68 ± 1.33 |                          |         |
|       | 400                   | 78.78 ± 0.87 |                          |         |
|       | Diclofenac            | 12.5         |                          |         |
| 25    |                       | 13.13 ± 1.82 |                          |         |
| 50    |                       | 25.25 ± 1.33 |                          |         |
| 100   |                       | 45.95 ± 1.01 |                          |         |
| 200   |                       | 53.03 ± 1.74 |                          |         |
| 400   |                       | 64.14 ± 1.33 |                          |         |

% Inhibition =  $\frac{(Absorbance_{Test\ sample} - Absorbance_{Negative\ control})}{(Absorbance_{Negative\ control})} \times 100\ %$ ; the negative control contained

all reagents except the extract or diclofenac, while the test sample consisted of the reaction mixture containing either MEHFL or diclofenac. Results are expressed as mean ± SEM (n = 3).

**Table ST5:**  $\alpha$ -amylase inhibitory activity of the methanolic extract of *H. fomes* leaves (MEHFL) in  $\alpha$ -amylase inhibition assay.

| Group    | Concentration ( $\mu\text{g/mL}$ ) | % Inhibition     | $\text{IC}_{50}$ ( $\mu\text{g/mL}$ ) | <i>p</i> -value                   |
|----------|------------------------------------|------------------|---------------------------------------|-----------------------------------|
| MEHFL    | 12.5                               | 36.16 $\pm$ 0.51 | 40.07 $\pm$ 0.18                      | 1.09 $\times$<br>10 <sup>-6</sup> |
|          | 25                                 | 44.94 $\pm$ 0.39 |                                       |                                   |
|          | 50                                 | 49.40 $\pm$ 0.64 |                                       |                                   |
|          | 100                                | 58.63 $\pm$ 1.07 |                                       |                                   |
|          | 200                                | 69.94 $\pm$ 0.14 |                                       |                                   |
|          | 400                                | 90.32 $\pm$ 0.29 |                                       |                                   |
| Acarbose | 12.5                               | 29.01 $\pm$ 0.51 | 78.52 $\pm$ 0.32                      |                                   |
|          | 25                                 | 39.58 $\pm$ 0.82 |                                       |                                   |
|          | 50                                 | 45.68 $\pm$ 0.78 |                                       |                                   |
|          | 100                                | 54.31 $\pm$ 0.39 |                                       |                                   |
|          | 200                                | 59.67 $\pm$ 0.39 |                                       |                                   |
|          | 400                                | 65.02 $\pm$ 0.29 |                                       |                                   |

% Inhibition =  $\frac{(\text{Absorbance}_{\text{Negative control}} - \text{Absorbance}_{\text{Test sample}})}{(\text{Absorbance}_{\text{Negative control}})} \times 100$  %; the negative control contained

all reagents except the extract or acarbose, while the test sample consisted of the reaction mixture containing either MEHFL or acarbose. Results are expressed as mean  $\pm$  SEM (n = 3).

**Table ST6:**  $\alpha$ -glucosidase inhibitory activity of the methanolic extract of *H. fomes* leaves (MEHFL) in  $\alpha$ -glucosidase inhibition assay.

| Group    | Concentration ( $\mu\text{g/mL}$ ) | % Inhibition     | $\text{IC}_{50}$ ( $\mu\text{g/mL}$ ) | <i>p</i> -value                   |
|----------|------------------------------------|------------------|---------------------------------------|-----------------------------------|
| MEHFL    | 12.5                               | 37.10 $\pm$ 0.30 | 35.75 $\pm$ 1.42                      | 8.48 $\times$<br>10 <sup>-5</sup> |
|          | 25                                 | 46.20 $\pm$ 0.84 |                                       |                                   |
|          | 50                                 | 54.84 $\pm$ 1.22 |                                       |                                   |
|          | 100                                | 62.19 $\pm$ 0.60 |                                       |                                   |
|          | 200                                | 68.96 $\pm$ 1.16 |                                       |                                   |
|          | 400                                | 74.09 $\pm$ 0.92 |                                       |                                   |
| Acarbose | 12.5                               | 27.30 $\pm$ 0.11 | 84.34 $\pm$ 2.01                      |                                   |
|          | 25                                 | 33.02 $\pm$ 0.30 |                                       |                                   |
|          | 50                                 | 39.67 $\pm$ 0.23 |                                       |                                   |
|          | 100                                | 55.54 $\pm$ 0.40 |                                       |                                   |
|          | 200                                | 64.06 $\pm$ 0.42 |                                       |                                   |
|          | 400                                | 67.21 $\pm$ 0.61 |                                       |                                   |

% Inhibition =  $\frac{(\text{Absorbance}_{\text{Negative control}} - \text{Absorbance}_{\text{Test sample}})}{(\text{Absorbance}_{\text{Negative control}})} \times 100$  %; the negative control contained

all reagents except the extract or acarbose, while the test sample consisted of the reaction mixture containing either MEHFL or acarbose. Results are expressed as mean  $\pm$  SEM (n = 3).

**Table ST7:** Effects of the different concentrations of the methanolic extract of *H. fomes* leaves (MEHFL) in brine shrimp lethality bioassay.

| Group   | Concentration (µg/mL) | % Mortality  | LC <sub>50</sub> (µg/mL) | p-value  | Toxicity class (Meyer) |
|---------|-----------------------|--------------|--------------------------|----------|------------------------|
| MEHFL   | 12.5                  | 4.44 ± 2.22  | 328.57 ± 2.12            | 0.000248 | Moderate               |
|         | 25                    | 8.89 ± 2.22  |                          |          |                        |
|         | 50                    | 22.22 ± 2.22 |                          |          |                        |
|         | 100                   | 33.33 ± 0    |                          |          |                        |
|         | 200                   | 40 ± 3.85    |                          |          |                        |
|         | 400                   | 55.56 ± 2.22 |                          |          |                        |
| Control | 12.5                  | 24.44 ± 2.22 | 56.25 ± 4.62             |          | Highly toxic           |
|         | 25                    | 40 ± 7.7     |                          |          |                        |
|         | 50                    | 48.89 ± 5.88 |                          |          |                        |
|         | 100                   | 57.78 ± 2.22 |                          |          |                        |
|         | 200                   | 66.67 ± 3.85 |                          |          |                        |
|         | 400                   | 77.78 ± 5.88 |                          |          |                        |

% Mortality =  $\frac{(Total\ Nauplii - Alive\ Nauplii)}{(Total\ Nauplii)} \times 100$  %. Results are expressed as mean ± SEM (n = 3).

**Table ST8:** Observations and appearance of MEHFL (methanolic extract of *H. fomes* leaves) and control groups during 14-day study period.

| Group               | Observation         | Day 01      | Day 02 | Day 03 | Day 04 | Day 05 | Day 06 | Day 07 | Day 08 | Day 09 | Day 10 | Day 11 | Day 12 | Day 13 | Day 14 |     |
|---------------------|---------------------|-------------|--------|--------|--------|--------|--------|--------|--------|--------|--------|--------|--------|--------|--------|-----|
| MEHFL               | Skin                |             | Nor    |     |
|                     | and fur             | Normal      | mal    |     |
|                     | Eyes                | Normal      | mal    |     |
|                     | Behavioral patterns | Normal      | mal    |     |
|                     | Salivatory          |             | Nor    |     |
|                     | on Lethargy         | Normal      | mal    |     |
|                     |                     |             | Nor    |     |
|                     | Sleep               | Normal      | mal    |     |
|                     | Diarrhea            |             | Nor    |     |
|                     |                     | Normal      | mal    |     |
|                     | Coma                | N. O        | N. O   | N. O   | N. O   | N. O   | N. O   | N. O   | N. O   | N. O   | N. O   | N. O   | N. O   | N. O   | N. O   |     |
|                     | Tremors             | N. O        | N. O   | N. O   | N. O   | N. O   | N. O   | N. O   | N. O   | N. O   | N. O   | N. O   | N. O   | N. O   | N. O   |     |
|                     | Control             | Skin        |        | Nor    | Nor |
|                     |                     | and fur     | Normal | mal    | mal |
| Eyes                |                     | Normal      | mal    |     |
| Behavioral patterns |                     | Hyperactive | Nor    |     |
| Salivatory          |                     |             | Nor    |     |
| on Lethargy         |                     | Normal      | mal    |     |
|                     |                     |             | Nor    |     |
| Sleep               |                     | Normal      | mal    |     |
| Diarrhea            |                     |             | Nor    |     |
|                     |                     | Normal      | mal    |     |
| Coma                |                     | N. O        | N. O   | N. O   | N. O   | N. O   | N. O   | N. O   | N. O   | N. O   | N. O   | N. O   | N. O   | N. O   | N. O   |     |
| Tremors             |                     | N. O        | N. O   | N. O   | N. O   | N. O   | N. O   | N. O   | N. O   | N. O   | N. O   | N. O   | N. O   | N. O   | N. O   |     |

N. O = Not observed

**Table ST9:** Changes in body weight (g) of mice during the acute oral toxicity study of the methanolic extract of *H. fomes* leaves (MEHFL).

| Day | Control (g)  | MEHFL (g)    | <i>p</i> -value |
|-----|--------------|--------------|-----------------|
| W0  | 24.41 ± 0.49 | 25.74 ± 0.71 | 0.164           |
| W1  | 26.59 ± 0.72 | 28.13 ± 0.85 | 0.204           |
| W2  | 28.46 ± 0.88 | 30.64 ± 0.87 | 0.117           |

Here W0, W1, and W2 represents day 0, 7 and 14 respectively. Data are represented as mean ± SEM (n = 5).

**Table ST10:** Effect of the methanolic extract of *H. fomes* Leaves (MEHFL) on blood glucose levels in mice during the Oral Glucose Tolerance Test.

| Group            | Time (min) | Blood glucose level (mmol/L)  | AUC (mmol/L.min <sup>-1</sup> )  | Total blood glucose (mmol/L)   |
|------------------|------------|-------------------------------|----------------------------------|--------------------------------|
| Negative control | 30         | 5.68 ± 0.29                   | 545.70 ± 13.21                   | 18.18 ± 0.41                   |
|                  | 60         | 4.74 ± 0.10                   |                                  |                                |
|                  | 90         | 4.14 ± 0.10                   |                                  |                                |
|                  | 120        | 3.62 ± 0.10                   |                                  |                                |
| Positive control | 30         | 5.50 ± 0.11                   | 521.40 ± 9.97                    | 17.42 ± 0.34                   |
|                  | 60         | 4.48 ± 0.21                   |                                  |                                |
|                  | 90         | 4.08 ± 0.08                   |                                  |                                |
|                  | 120        | 3.36 ± 0.12                   |                                  |                                |
| MEHFL-250        | 30         | 4.62 ± 0.29 <sup>*(a)</sup>   | 465.33 ± 28.93                   | 15.60 ± 0.92                   |
|                  | 60         | 4.16 ± 0.23                   |                                  |                                |
|                  | 90         | 3.74 ± 0.27                   |                                  |                                |
|                  | 120        | 3.08 ± 0.13                   |                                  |                                |
| MEHFL-500        | 30         | 4.40 ± 0.18 <sup>*(b)</sup>   | 416.40 ± 12.52 <sup>***(a)</sup> | 13.88 ± 0.38 <sup>***(a)</sup> |
|                  | 60         | 3.48 ± 0.16 <sup>***(a)</sup> |                                  |                                |
|                  | 90         | 3.36 ± 0.16 <sup>***(a)</sup> |                                  |                                |
|                  | 120        | 2.64 ± 0.14 <sup>***(a)</sup> |                                  |                                |

Data are presented as mean ± SEM (n = 5). Statistical significance was determined by one-way ANOVA followed by Dunnett post hoc test, where \*, \*\*, and \*\*\* indicate *p* < 0.05, 0.01, and 0.001 versus the negative control, and (a), (b), and (c) indicate *p* < 0.05, 0.01, and 0.001 versus the positive control. Here, AUC = Area under the curve.

**Table ST11:** Effect of the methanolic extract of *H. fomes* Leaves (MEHFL) on fasting glucose levels (FBG) in alloxan induced diabetic rats during the 21 days study period.

| Group            | Days | FBG (mmol/L)     | AUC (mmol/L.min <sup>-1</sup> ) | Total blood glucose (mmol/L) |
|------------------|------|------------------|---------------------------------|------------------------------|
| Normal control   | 1    | 6.56 ± 0.18      | 127.01 ± 2.12***                | 25.40 ± 0.37***              |
|                  | 7    | 6.40 ± 0.32      |                                 |                              |
|                  | 14   | 6.34 ± 0.21      |                                 |                              |
|                  | 21   | 6.10 ± 0.04      |                                 |                              |
| Negative control | 1    | 15.70 ± 0.32     | 301.73 ± 1.90                   | 60.62 ± 0.41                 |
|                  | 7    | 15.32 ± 0.26     |                                 |                              |
|                  | 14   | 14.70 ± 0.11     |                                 |                              |
|                  | 21   | 14.90 ± 0.24     |                                 |                              |
| Positive control | 1    | 13.26 ± 0.23     | 266.75 ± 3.14                   | 52.94 ± 0.54                 |
|                  | 7    | 13.80 ± 0.22     |                                 |                              |
|                  | 14   | 13.34 ± 0.17     |                                 |                              |
|                  | 21   | 12.54 ± 0.19     |                                 |                              |
| MEHFL-250        | 1    | 17.88 ± 0.47     | 193.08 ± 7.62*                  | 42.00 ± 1.51*                |
|                  | 7    | 9.66 ± 1.11*     |                                 |                              |
|                  | 14   | 7.44 ± 0.48**    |                                 |                              |
|                  | 21   | 7.02 ± 0.57**    |                                 |                              |
| MEHFL-500        | 1    | 13.98 ± 0.99     | 166.42 ± 7.81**(a)              | 35.66 ± 1.81**(a)            |
|                  | 7    | 8.22 ± 0.58**(a) |                                 |                              |
|                  | 14   | 6.84 ± 0.29**(a) |                                 |                              |
|                  | 21   | 6.62 ± 0.38**(a) |                                 |                              |

Data are presented as mean ± SEM (n = 5). Statistical significance was determined by one-way ANOVA followed by Dunnett post hoc test, where \*, \*\*, and \*\*\* indicate p < 0.05, 0.01, and 0.001 versus the negative control, and (a), (b), and (c) indicate p < 0.05, 0.01, and 0.001 versus the positive control. Here, AUC = Area under the curve.

**Table ST12:** Secondary metabolite profile of the methanolic extract of *H. fomes* Leaves (MEHFL) identified via GC-MS analysis.

| Serial No | Peak                                                       | RT (min) | Area (Count.min) |
|-----------|------------------------------------------------------------|----------|------------------|
| 1.        | 1,3-Butanediamine, N,N,N',N'-tetramethyl-                  | 7.152    | 669675.2         |
| 2.        | Trifluoroacetaldehyde hydrate                              | 7.407    | 349890.2         |
| 3.        | Alpha-1-rhamnopyranose                                     | 8.111    | 123557.2         |
| 4.        | 3-Hexenoic acid, (E)-                                      | 8.601    | 737416.4         |
| 5.        | 2,4-Dodecadienal, (E,E)-                                   | 8.933    | 291029.7         |
| 6.        | Benzyl alcohol                                             | 9.262    | 199926.9         |
| 7.        | 1-Amino-2,6-dimethylpiperidine                             | 9.402    | 157285.9         |
| 8.        | 2,6-Dimethylhex-4-enamidine, 2-(3-methylbut-2-enyl)-       | 9.503    | 195880.1         |
| 9.        | Methyl 1-methylpyrrole-2-carboxylate                       | 9.755    | 181735.6         |
| 10.       | 3-Hydroxypropionic acid                                    | 9.875    | 102074.9         |
| 11.       | Hexanoic acid                                              | 10.023   | 154092.2         |
| 12.       | Phenylethyl Alcohol                                        | 10.794   | 315688.5         |
| 13.       | 4H-Pyran-4-one, 2,3-dihydro-3,5-dihydroxy-6-methyl-        | 11.394   | 127069           |
| 14.       | Methyl salicylate                                          | 12.216   | 287157.5         |
| 15.       | Azacyclohexan-3-one, 1,5,6-trimethyl-                      | 12.307   | 1142858          |
| 16.       | Benzo-furan, 2,3-dihydro-                                  | 12.572   | 454147.9         |
| 17.       | 2-Aminopyrimidine-1-oxide                                  | 12.743   | 658541.4         |
| 18.       | 1-Pyrrolid-2-one, N-carboxyhydrazide                       | 13.199   | 185232.6         |
| 19.       | Nonanoic acid                                              | 13.279   | 277454.1         |
| 20.       | Talopyranoside, methyl 4-acetamido-4,6-dideoxy-, a-D-      | 13.598   | 894979.2         |
| 21.       | 3-Amino-4-fluorophenol, N,O-dimethyl-                      | 13.792   | 1160798          |
| 22.       | Thiazolidine, 2-(2-furyl)-                                 | 13.886   | 1050841          |
| 23.       | 2-Methoxy-4-vinylphenol                                    | 14.040   | 428318.7         |
| 24.       | Acetic acid, (3-methyl-2-nitrophenyl)methyl ester          | 14.483   | 294471.8         |
| 25.       | Phenol, 2,6-dimethoxy-                                     | 14.550   | 362216.6         |
| 26.       | Deoxycytidine                                              | 15.124   | 136327.3         |
| 27.       | 1,4-Benzenediol, 2-methoxy-                                | 15.191   | 143550.1         |
| 28.       | 4-Hydroxybutyl acrylate                                    | 15.442   | 253600           |
| 29.       | Benzo-furan-4(5H)-one, 6,7-dihydro-, oxime                 | 15.734   | 333805.6         |
| 30.       | Urea, N,N'-bis(3-methylphenyl)-                            | 16.307   | 122990.1         |
| 31.       | 2(3H)-Furanone, 5-(2,5-dimethylphenyl)-                    | 16.334   | 108256.3         |
| 32.       | D-Allose                                                   | 16.599   | 1214127          |
| 33.       | (Z)-4-hydroxy-3-methoxybenzaldehyde O-methyl oxime         | 16.767   | 207941           |
| 34.       | Bicyclo[2.2.1]heptan-2-one, 1,7,7-trimethyl-, oxime, (1R)- | 16.851   | 184335.5         |
| 35.       | 1,4-Dihydro-1,2-dimethylquinolin-4-ylidenemethane          | 16.935   | 333921.6         |
| 36.       | 2-Cyclohexen-1-one, 3-(3-hydroxybutyl)-2,4,4-trimethyl-    | 17.032   | 543268           |
| 37.       | Dodecanoic acid                                            | 17.166   | 189615           |
| 38.       | 3-Hydroxy-4-methoxybenzoic acid                            | 17.260   | 125086.3         |
| 39.       | Phenol, 4-ethenyl-2,6-dimethoxy-                           | 17.320   | 817377.2         |
| 40.       | Benzoic acid, 3-amino-6-(1-pyrrolidinyl)-                  | 17.417   | 129826.1         |
| 41.       | Ethanol, 2-(9-octadecenyl)-, (Z)-                          | 17.585   | 109090.2         |

|     |                                                                                                                         |        |          |
|-----|-------------------------------------------------------------------------------------------------------------------------|--------|----------|
| 42. | Cyclooctane, (methoxymethoxy)-                                                                                          | 17.662 | 206342.9 |
| 43. | Ginsenoine E                                                                                                            | 17.810 | 659485.5 |
| 44. | (E)-3-(2-(3-(hydroxymethyl)cyclopentyl)-4-methylpenta-1,3-dien-1-yl)-2,2,4-trimethylcyclobutan-1-ol                     | 18.363 | 142631.6 |
| 45. | Benzenepropanol, 4-hydroxy-3-methoxy-                                                                                   | 18.403 | 185012.2 |
| 46. | 2,4-Dimethoxythiophenol                                                                                                 | 18.450 | 324615   |
| 47. | 2-Butanol, 4-(2,2-dimethyl-6-methylenecyclohexylidene)-                                                                 | 18.561 | 633950   |
| 48. | 2,6,10,10-Tetramethyl-1-oxaspiro[4.5]decan-6-ol                                                                         | 18.735 | 311835.4 |
| 49. | Dnp-L-serine                                                                                                            | 18.886 | 155409.2 |
| 50. | (E)-2,6-Dimethoxy-4-(prop-1-en-1-yl)phenol                                                                              | 19.094 | 293476.4 |
| 51. | Propanoic acid, 2-(tricyclo[3.3.1.1 <sup>3,7</sup> ]dec-2-ylidene)-                                                     | 19.232 | 654181.2 |
| 52. | Phomenone                                                                                                               | 19.329 | 214338.7 |
| 53. | 3-Allyl-6-methoxyphenol                                                                                                 | 19.530 | 147454.3 |
| 54. | Tetradecanoic acid                                                                                                      | 19.788 | 514094.7 |
| 55. | (+)-1,2,3,4-Tetrahydroisoquinolin-6-ol-1-carboxylic acid, 7-methoxy-1-methyl-, methyl(ester)                            | 19.882 | 174016.2 |
| 56. | 1,3-2H-Isobenzofuranone, 3,3,4,7-tetramethyl-6-nitro-                                                                   | 20.006 | 321420.5 |
| 57. | 6-Hydroxy-4,4,7a-trimethyl-5,6,7,7a-tetrahydrobenzofuran-2(4H)-one                                                      | 20.117 | 903303   |
| 58. | Sydonol                                                                                                                 | 20.238 | 174429   |
| 59. | Benzoic acid, 4-hydroxy-3,5-dimethoxy-                                                                                  | 20.647 | 468027.6 |
| 60. | Neophytadiene                                                                                                           | 20.982 | 4113653  |
| 61. | 3-[3-Bromophenyl]-7-chloro-3,4-dihydro-10-hydroxy-1,9(2H,10H)-acridinedione                                             | 21.076 | 188938.4 |
| 62. | 2,2,6,7-Tetramethyl-10-oxatricyclo[4.3.1.0(1,6)]decan-5-ol                                                              | 21.173 | 518960.3 |
| 63. | 3,7,11,15-Tetramethyl-2-hexadecen-1-ol                                                                                  | 21.351 | 633291.2 |
| 64. | Dihydrosyringenin                                                                                                       | 21.861 | 2012167  |
| 65. | Cyclopropanebutanoic acid, 2-[[2-[[2-[(2-pentylcyclopropyl)methyl]cyclopropyl]methyl]cyclopropyl]methyl]-, methyl ester | 21.998 | 104761.1 |
| 66. | Pentadecanoic acid, 14-methyl-, methyl ester                                                                            | 22.284 | 360657.3 |
| 67. | n-Hexadecanoic acid                                                                                                     | 22.807 | 4415674  |
| 68. | 1-(4,5-dimethoxy-2-nitrophenyl)ethan-1-ol                                                                               | 22.894 | 734646.2 |
| 69. | Scopoletin                                                                                                              | 22.998 | 120453.9 |
| 70. | trans-Sinapyl alcohol                                                                                                   | 23.404 | 146866.7 |
| 71. | trans-Shisool                                                                                                           | 23.511 | 218077.8 |
| 72. | Atis-16-ene, (5 $\beta$ ,8 $\alpha$ ,9 $\beta$ ,10 $\alpha$ ,12 $\alpha$ )-                                             | 24.467 | 410264.4 |
| 73. | Isofraxidin                                                                                                             | 25.000 | 142619.5 |
| 74. | Phytol                                                                                                                  | 25.268 | 2320216  |
| 75. | Linoelaidic acid                                                                                                        | 25.550 | 628594.2 |
| 76. | cis-Vaccenic acid                                                                                                       | 25.644 | 2158761  |
| 77. | Octadecanoic acid                                                                                                       | 25.996 | 719019.8 |
| 78. | 2-[(E)-4-(1,4-Dihydroxy-2,2,6-trimethylcyclohexyl)but-3-en-2-yl]oxy-6-(hydroxymethyl)oxane-3,4,5-triol, 5TMS            | 27.374 | 205634.2 |
| 79. | 2H-Pyran-2-one, tetrahydro-6-tridecyl-                                                                                  | 29.095 | 103055.1 |
| 80. | s-Indacene, 1,2,3,5,6,7-hexahydro-1,1,4,8-tetramethyl-                                                                  | 29.487 | 279681.9 |
| 81. | 1,9-Dioxacyclohexadeca-4,13-diene-2-10-dione, 7,8,15,16-tetramethyl-                                                    | 30.711 | 200748.8 |
| 82. | Triethylene glycol                                                                                                      | 30.989 | 105771.3 |
| 83. | 1-Heptatriacotanol                                                                                                      | 31.291 | 1070953  |
| 84. | Hexadecanoic acid, 2-hydroxy-1-(hydroxymethyl)ethyl ester                                                               | 31.429 | 1296591  |

|     |                                                                                                           |        |          |
|-----|-----------------------------------------------------------------------------------------------------------|--------|----------|
| 85. | Phthalic acid, octyl 2-propylpentyl ester                                                                 | 32.059 | 167482.4 |
| 86. | 4-Hydroxybutyl hexadecanoate                                                                              | 32.301 | 549045.9 |
| 87. | 3-Hydroxypropyl hexadecanoate                                                                             | 32.371 | 209885.2 |
| 88. | (E)-3,3'-Dimethoxy-4,4'-dihydroxystilbene                                                                 | 33.615 | 317242.6 |
| 89. | Oleic anhydride                                                                                           | 34.105 | 159226.1 |
| 90. | Octadecanoic acid, 2-hydroxy-1-(hydroxymethyl)ethyl ester                                                 | 34.457 | 511088.8 |
| 91. | Phytyl decanoate                                                                                          | 34.658 | 5630088  |
| 92. | Phytyl heptadecanoate                                                                                     | 34.870 | 732947.7 |
| 93. | 1,3-Dihydroxypropan-2-yl octadec-9-enoate, 2TMS                                                           | 35.165 | 555675.6 |
| 94. | (5 $\beta$ )Pregnane-3,20 $\beta$ -diol, 14a,18a-[4-methyl-3-oxo-(1-oxa-4-azabutane-1,4-diyl)], diacetate | 35.255 | 176244.5 |
| 95. | Squalene                                                                                                  | 36.060 | 19082376 |
| 96. | (E,E,E)-3,7,11,15-Tetramethylhexadeca-1,3,6,10,14-pentaene                                                | 36.379 | 749271.9 |
| 97. | Rhodopin                                                                                                  | 36.727 | 137570.5 |

RT = Retention time

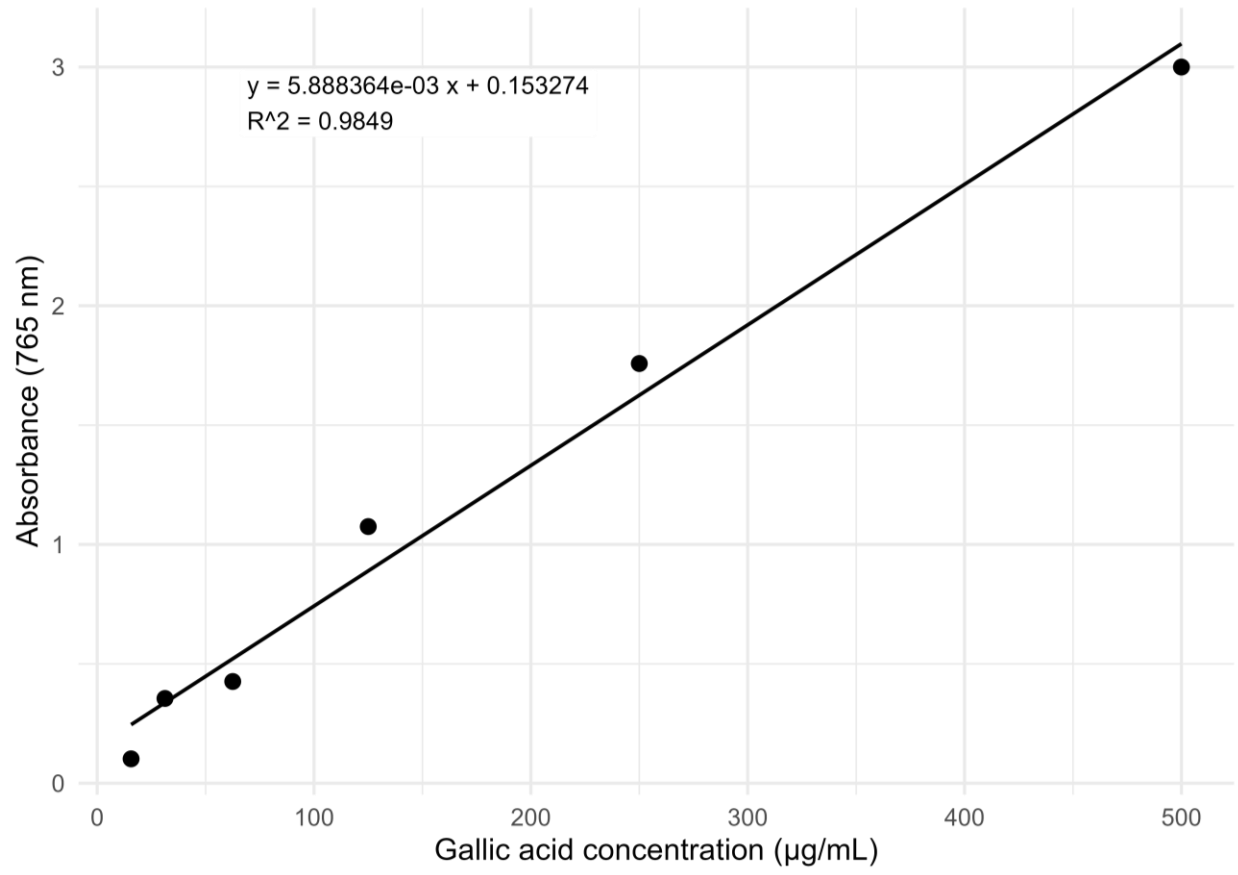

**Figure SF1:** Gallic acid calibration curve for total phenolic content (TPC).

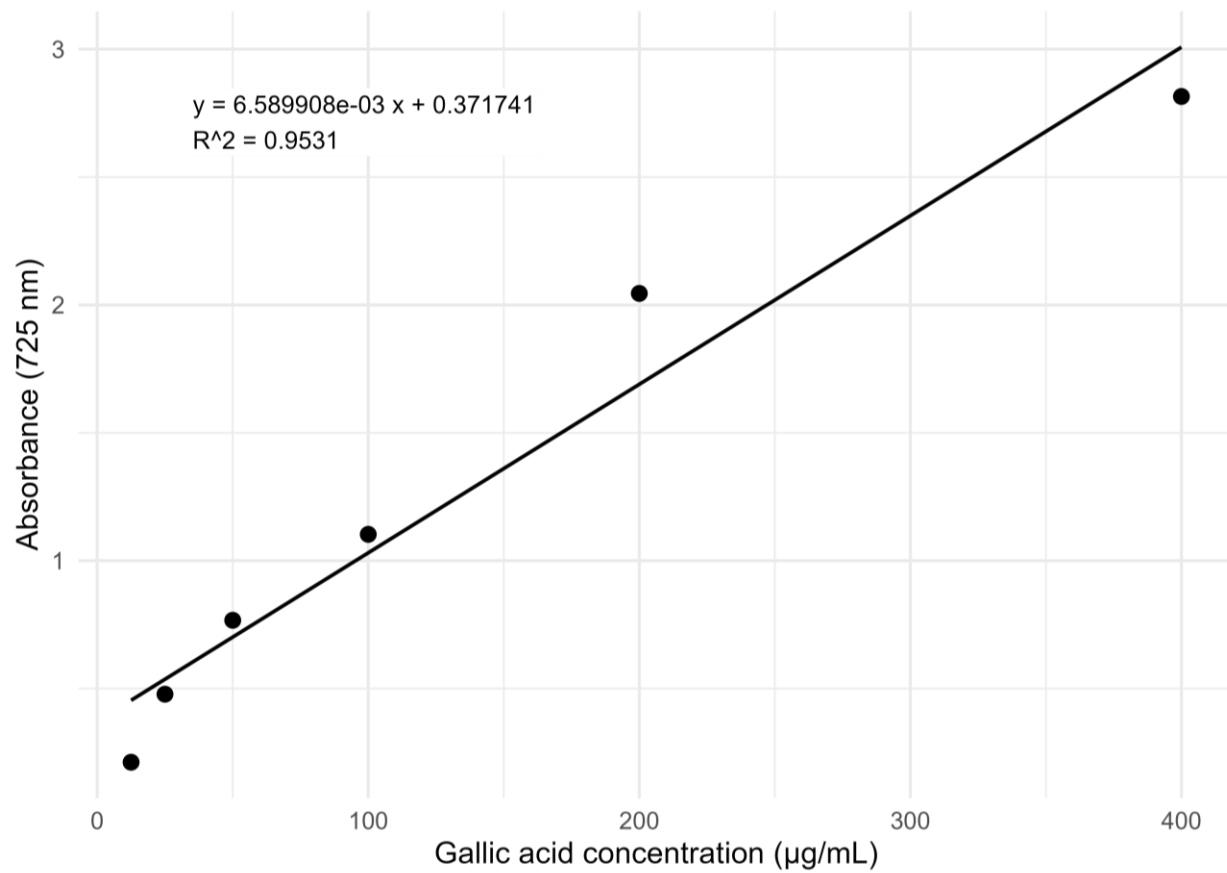

**Figure SF2:** Gallic acid calibration curve for total tannin content (TTC).

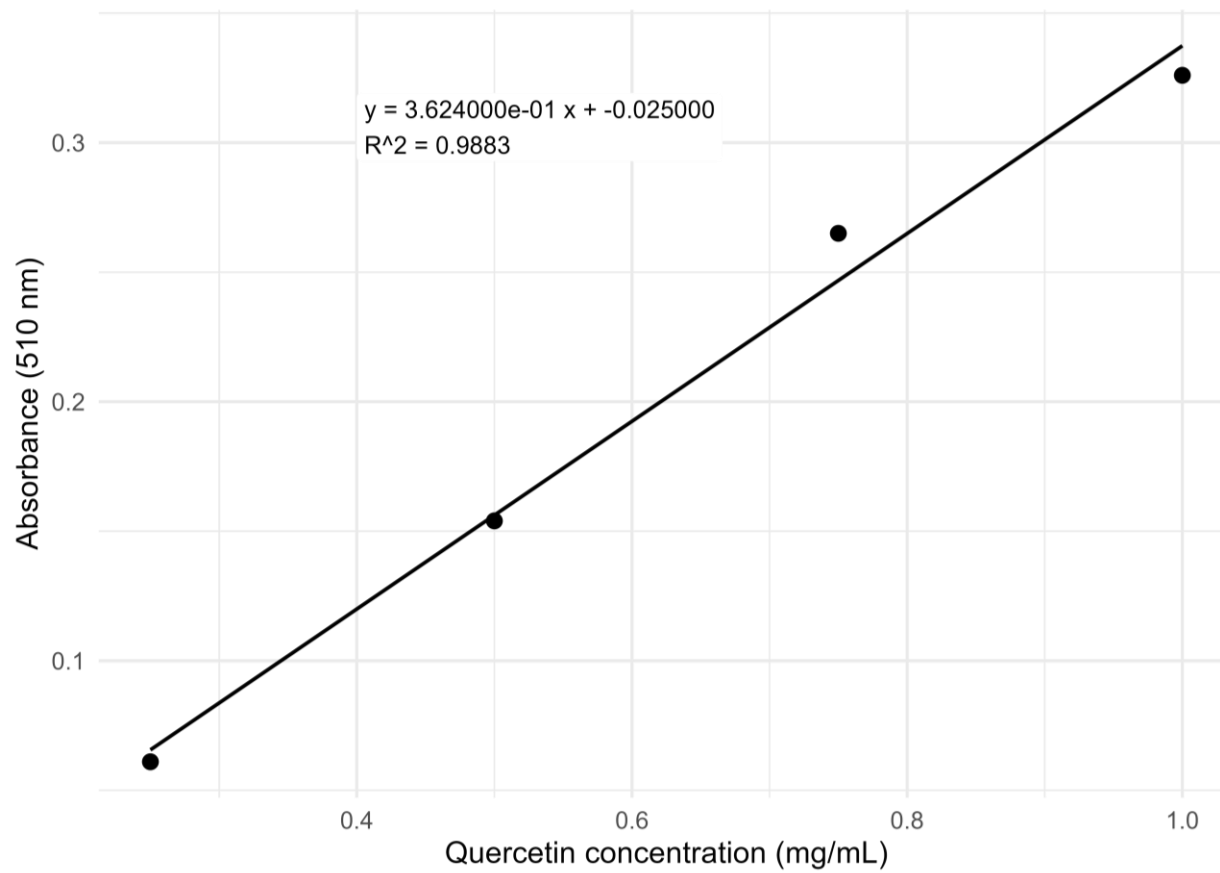

**Figure SF3:** Quercetin calibration curve for total flavonoid content (TFC).
