# Supplementary material
Source: Research Square preprint supplement (doi:10.21203/rs.3.rs-9524528/v1)
Supplement: Supplementary file 2 [file 6335e832c0c26464f129bc4a.pdf]

## Supplementary in silico data

**Table ST13:** General information of the ligand library for the computational analysis.

| Compound | Name                                         | PubChem<br>CID | 2D Structure                                                                                                                                    | Optimized 3D structure                                                                |
|----------|----------------------------------------------|----------------|-------------------------------------------------------------------------------------------------------------------------------------------------|---------------------------------------------------------------------------------------|
| 1        | 1,3-Butanediamine,<br>N,N,N',N'-tetramethyl- | 7350           | 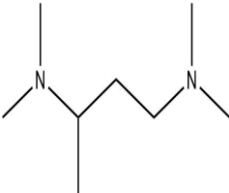<br><chem>CC(CCN(C)C)N(C)C</chem>                              |    |
| 2        | Trifluoroacetaldehyde<br>hydrate             | 67901          | <br><chem>C(C(F)(F)F)(O)O</chem>                               |    |
| 3        | Alpha-l-<br>rhamnopyranose                   | 439710         | <br><chem>C[C@H]1[C@@H]([C@H]([C@H]([C@@H](O1)O)O)O)O</chem> |   |
| 4        | 3-Hexenoic acid, (E)-                        | 5282708        | <br><chem>CC/C=C/CC(=O)O</chem>                             |  |
| 5        | 2,4-Dodecadienal,<br>(E,E)-                  | 5367530        | <br><chem>CCCCC/C=C/C=C/O</chem>                            |  |

|    |                                                    |        |                                                                                      |                                                                                       |
|----|----------------------------------------------------|--------|--------------------------------------------------------------------------------------|---------------------------------------------------------------------------------------|
|    |                                                    |        | 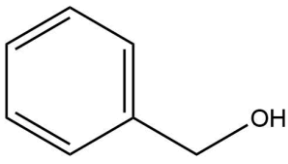   |    |
|    | Benzyl alcohol                                     | 244    | <chem>C1=CC=C(C=C1)CO</chem>                                                         |                                                                                       |
| 7  | 1-Amino-2,6-dimethylpiperidine                     | 123482 |     |    |
|    |                                                    |        | <chem>CC1CCCC(N1)C</chem>                                                            |                                                                                       |
| 8  | 2,6-Dimethylhex-4-enamide, 2-(3-methylbut-2-enyl)- | 586884 |     |    |
|    |                                                    |        | <chem>CC(=CCC(C)(CC=C(C)C)C(=N)N)C</chem>                                            |                                                                                       |
| 9  | Methyl methylpyrrole-2-carboxylate                 | 142178 |    |   |
|    |                                                    |        | <chem>CN1C=CC=C1C(=O)OC</chem>                                                       |                                                                                       |
| 10 | 3-Hydroxypropionic acid                            | 68152  |   |  |
|    |                                                    |        | <chem>C(CO)C(=O)O</chem>                                                             |                                                                                       |
| 11 | Hexanoic Acid                                      | 8892   |   |  |
|    |                                                    |        | <chem>CCCCCC(=O)O</chem>                                                             |                                                                                       |
| 12 | Phenylethyl Alcohol                                | 6054   |  |  |
|    |                                                    |        | <chem>C1=CC=C(C=C1)CCO</chem>                                                        |                                                                                       |

13

4H-Pyran-4-one, 2,3-dihydro-3,5-dihydroxy-6-methyl-

119838

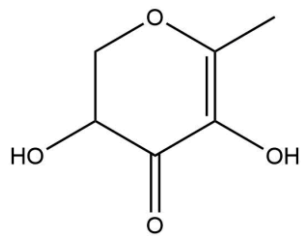
CC1=C(C(=O)C(CO1)O)O
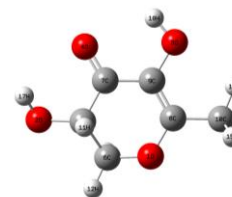

14

Methyl salicylate

4133

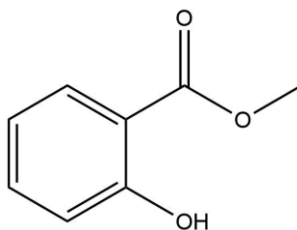
COC(=O)C1=CC=CC=C1O
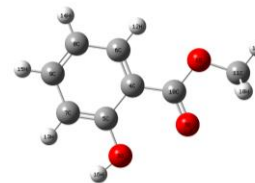

15

Azacyclohexan-3-one, 1,5,6-trimethyl-

566749

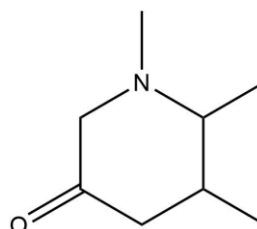
CC1CC(=O)CN(C1C)C
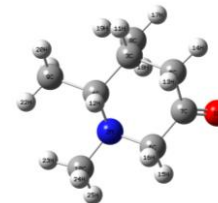

16

Benzofuran, 2,3-dihydro-

10329

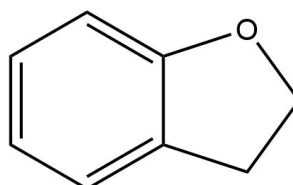
C1COC2=CC=CC=C21
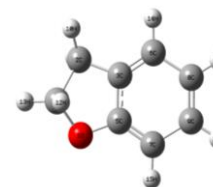

17

2-Aminopyrimidine-1-oxide

126623006

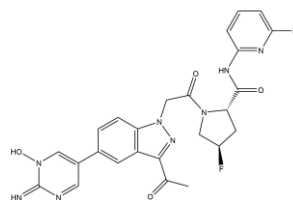
CC(=O)C1=NN(C2=C1C=C(C=C2)C3=CN(C(=N)N=C3O)CC(=O)N4C[C@@H](C[C@H]4C(=O)NC5=NC(=CC=C5)Br)
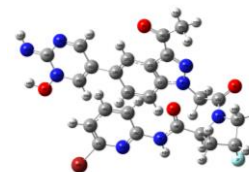

18

1-Pyrrolid-2-one, N-carboxyhydrazide

558364

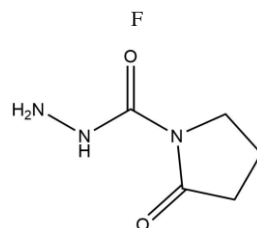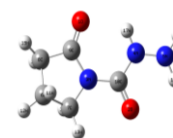

|    |                                                       |          | <chem>C1CC(=O)N(C1)C(=O)NN</chem>                                                                                                                  |                                                                                       |
|----|-------------------------------------------------------|----------|----------------------------------------------------------------------------------------------------------------------------------------------------|---------------------------------------------------------------------------------------|
| 19 |                                                       |          |                                                                                                                                                    |                                                                                       |
|    | Nonanoic acid                                         | 8158     | 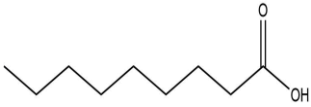<br><chem>CCCCCCCCC(=O)O</chem>                                  |    |
| 20 | Talopyranoside, methyl 4-acetamido-4,6-dideoxy-, a-D- | N/A      |                                                                  |    |
| 21 | 3-Amino-4-fluorophenol, N,O-dimethyl-                 | N/A      | <chem>CO[C@H]1O[C@@H]([C@H]([C@H]([C@H]1C)NC(C)=O)O)O</chem><br> |    |
| 22 |                                                       |          | <chem>COc1cc(F)cc(NC)c1</chem>                                                                                                                     |                                                                                       |
|    | Thiazolidine, 2-(2-furyl)-                            | 593153   | <br><chem>C1CSC(N1)C2=CC=CO2</chem>                            |  |
| 23 | 2-Methoxy-4-vinylphenol                               | 332      | <br><chem>COC1=C(C=CC(=C1)C=C)O</chem>                         |  |
| 24 | Acetic acid, (3-methyl-2-nitrophenyl)methyl ester     | 91723971 | <br><chem>CC1=C(C(=CC=C1)COC(=O)C)[N+](=O)[O-]</chem>          |  |

Phenol,  
dimethoxy-2,6-  
7041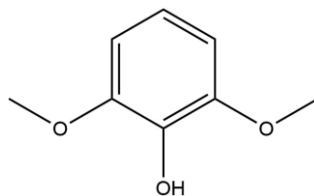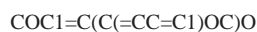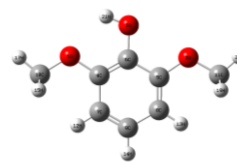

Deoxycytidine

13711

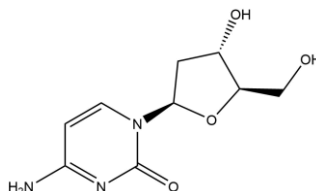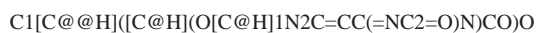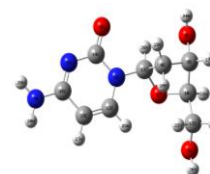1,4-Benzenediol,  
2-methoxy-2-  
69988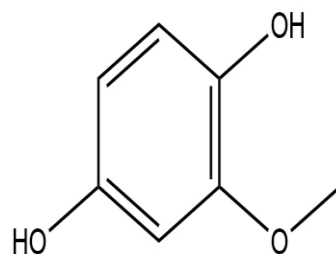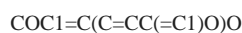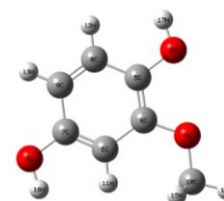4-Hydroxybutyl  
acrylate

75588

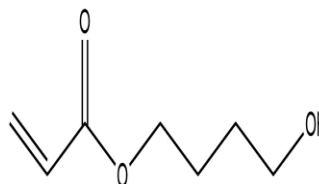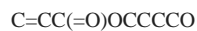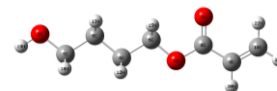Benzofuran-4(5H)-  
one, 6,7-dihydro-,  
oxime

6537039

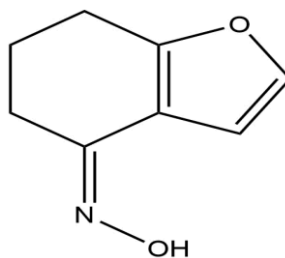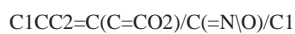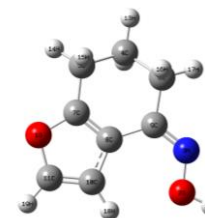Urea, N,N'-bis(3-  
methylphenyl)-

136428

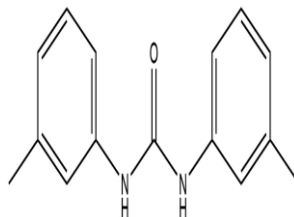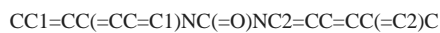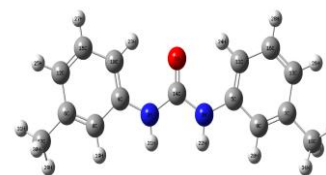

31

2(3H)-Furanone, 5-(2,5-dimethylphenyl)- 604728

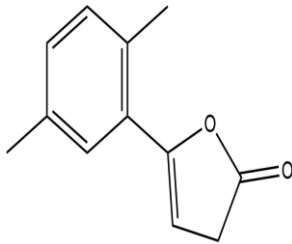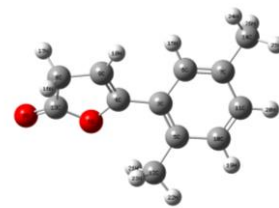

CC1=CC(=C(C=C1)C)C2=CCC(=O)O2

32

D-Allose 439507

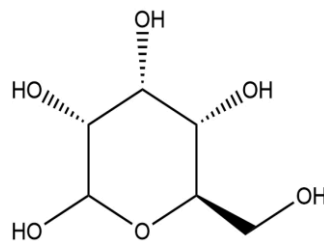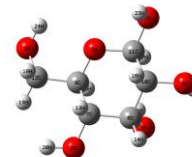

C([C@H]1[C@H]([C@H]([C@H]([C@H](C(O1)O)O)O)O)O)O

33

(Z)-4-hydroxy-3-methoxybenzaldehyde O-methyl oxime

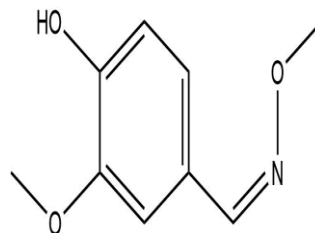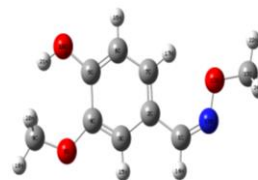

COC1=CC(/C=N\OC)=CC=C1O

34

Bicyclo[2.2.1]heptan-2-one, 1,7,7-trimethyl-, oxime, (1R)- 5908504

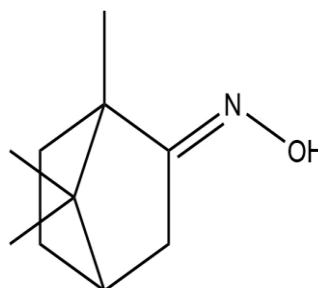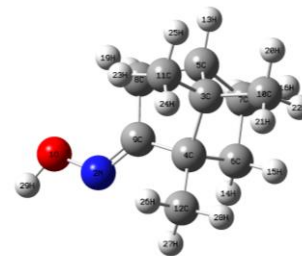

CC1(C2CCC1(/C(=N/O)/C2)C)C

35

1,4-Dihydro-1,2-dimethylquinolin-4-ylidenemethane 598718

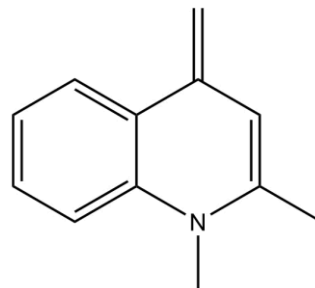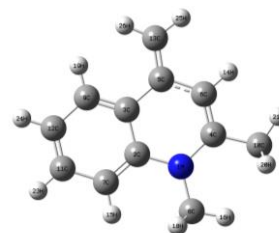

CC1(C2CCC1(/C(=N/O)/C2)C)C

36

2-Cyclohexen-1-one,  
3-(3-hydroxybutyl)-  
2,4,4-trimethyl-

520295

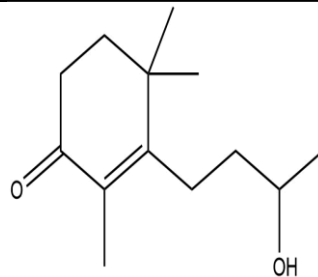
CC1=C(C(CCCC1=O)(C)C)CCC(C)O
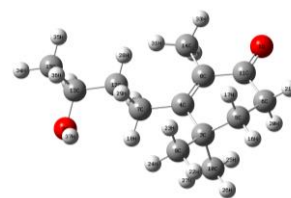

37

Dodecanoic acid

3893

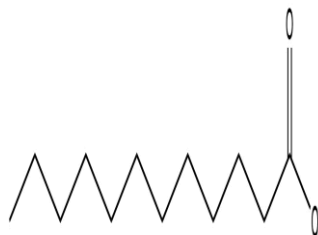
CCCCCCCCCCCC(=O)O
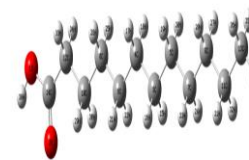

38

3-Hydroxy-4-methoxybenzoic acid

12575

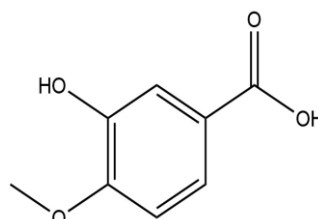
COC1=C(C=C(C=C1)C(=O)O)O
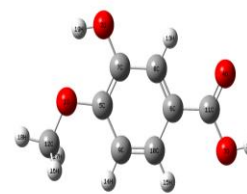

39

Phenol, 4-ethenyl-2,6-dimethoxy-

35960

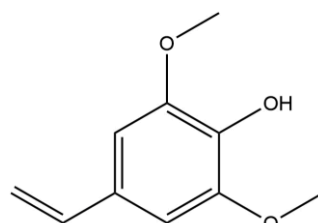
COC1=CC(=CC(=C1O)OC)C=C
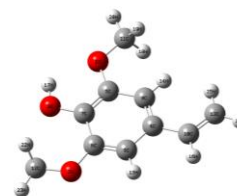

40

Benzoic acid, 3-amino-  
6-(1-pyrrolidinyl)-

609825

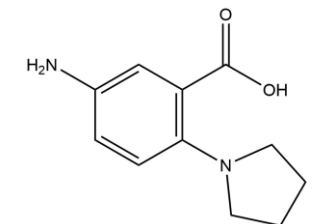
C1CCN(C1)C2=C(C=C(C=C2)N)C(=O)O
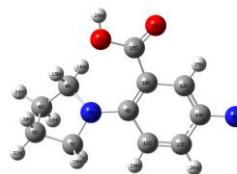

41

Ethanol, 2-(9-octadecenyl)-, (Z)- 5364713

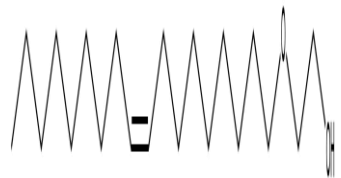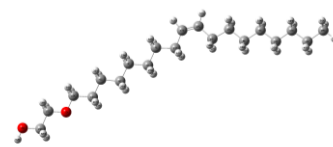

CCCCCCCC/C=C\CCCCCCCCOCCO

42

Cyclooctane, (methoxymethoxy)- 542175

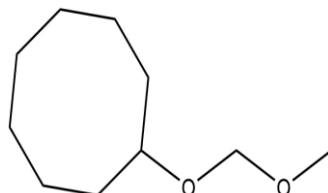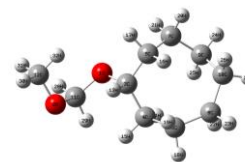

COCOC1CCCCCCC1

43

Ginsenosyne E 5320336

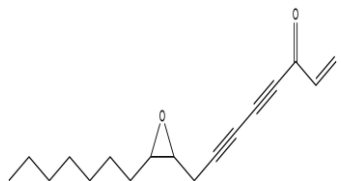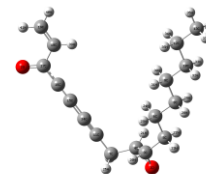

CCCCCCCC1C(O1)CC#CC#CC(=O)C=C

44

(E)-3-(2-(3-(hydroxymethyl)cyclopentyl)-4-methylpenta-1,3-dien-1-yl)-2,2,4-trimethylcyclobutan-1-ol

N/A

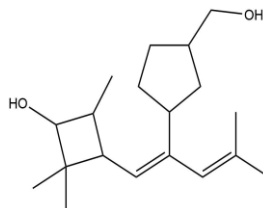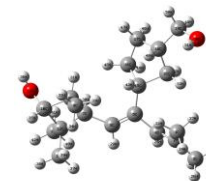

C/C(C)=C\C(C1CCC(C1)CO)=C\C2C(C(C2(C)C)O)C

45

Benzenepropanol, 4-hydroxy-3-methoxy- 16822

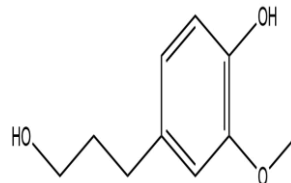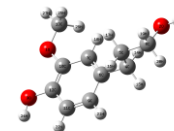

COC1=C(C=CC(=C1)CCCO)O

46

2,4-Dimethoxythiophenol 2758492

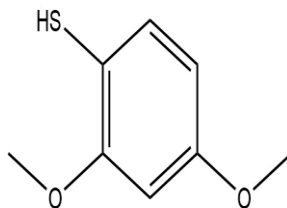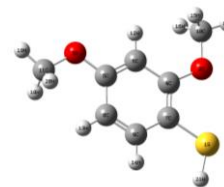

COC1=CC(=C(C=C1)S)OC

47

2-Butanol, 4-(2,2-dimethyl-6-methylenecyclohexylidene)-

5372134

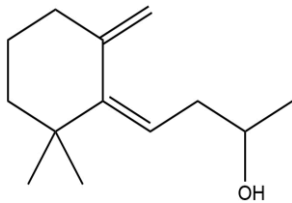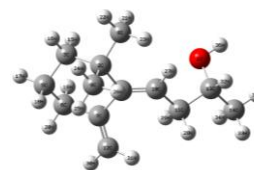
CC(C/C=C/1\C(=C)CCCC1(C)C)O

48

2,6,10,10-Tetramethyl-1-oxaspiro[4.5]decan-6-ol

65428

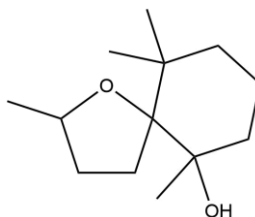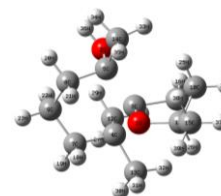
CC1CCC2(O1)C(CCCC2(O)C)C

49

Dnp-L-serine

96800

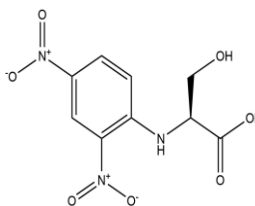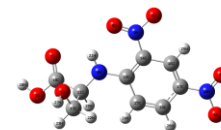
C1=CC(=C(C=C1[N+](=O)[O-])[N+](=O)[O-])N[C@@H](CO)C(=O)O

50

(E)-2,6-Dimethoxy-4-(prop-1-en-1-yl)phenol

5352905

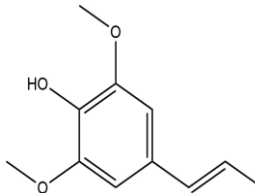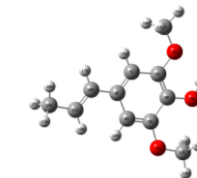
C/C=C/C1=CC(=C(C(=C1)OC)O)OC

51

Propanoic acid, 2-(tricyclo[3.3.1.1.3,7]dec-2-ylidene)-

609874

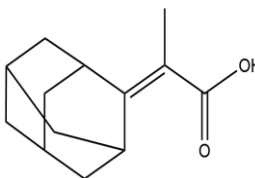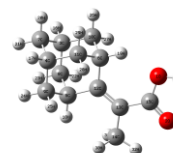
CC(=C1C2CC3CC(C2)CC1C3)C(=O)O

52

Phomenone

93306

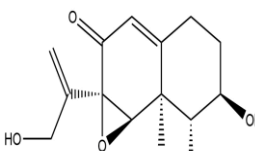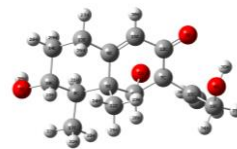
C[C@H]1[C@@H](CCC2=CC(=O)[C@]3([C@@H]([C@]12C)O3)C(=C)CO)O

53

3-Allyl-6-methoxyphenol

596375

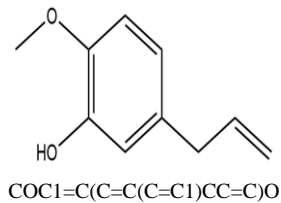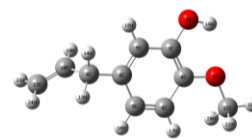

54

Tetradecanoic acid

11005

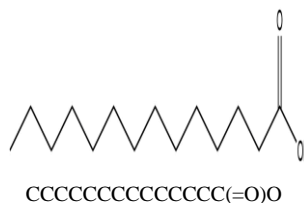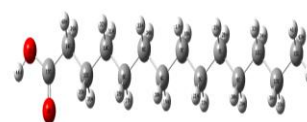

55

(+)-1,2,3,4-Tetrahydroisoquinolin-6-ol-1-carboxylic acid, 7-methoxy-1-methyl-, methyl(ester)

606044

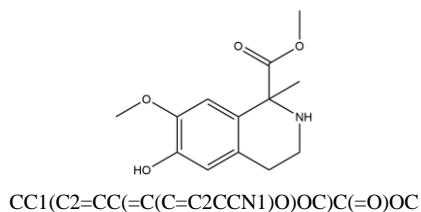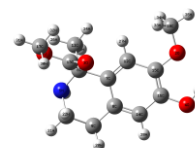

56

1,3-2H-Isobenzofuranone, 3,3,4,7-tetramethyl-6-nitro-

613231

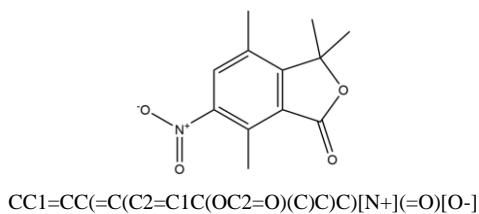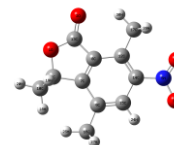

57

6-Hydroxy-4,4,7a-trimethyl-5,6,7,7a-tetrahydrobenzofuran-2(4H)-one

14334

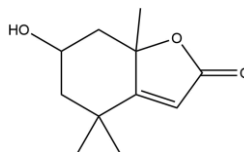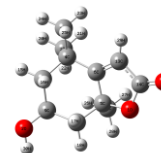

58

Sydonol

24011597

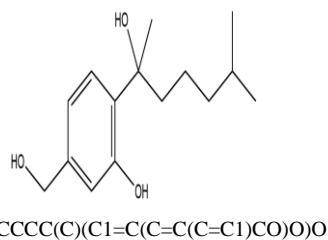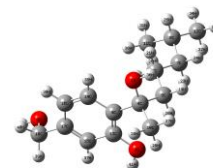

59

Benzoic acid, 4-hydroxy-3,5-dimethoxy-

10742

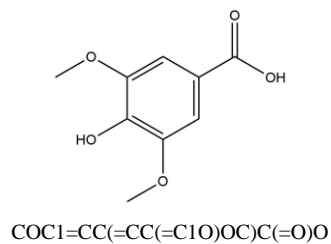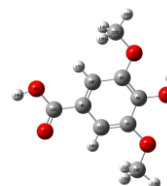

|                                                                                                                        |         |                                                                                      |                                                                                       |
|------------------------------------------------------------------------------------------------------------------------|---------|--------------------------------------------------------------------------------------|---------------------------------------------------------------------------------------|
| Neophytadiene                                                                                                          | 10446   | 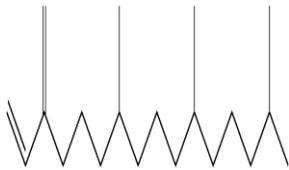   |    |
|                                                                                                                        |         | <chem>CC(C)CCCC(C)CCCC(C)CCCC(=C)C=C</chem>                                          |                                                                                       |
| 3-[3-Bromophenyl]-7-chloro-3,4-dihydro-10-hydroxy-1,9(2H,10H)-acridinedione                                            | 536420  |    |    |
|                                                                                                                        |         | <chem>C1C(CC(=O)C2=C1N(C3=C(C2=O)C=C(C=C3)Cl)O)C4=CC(=CC=C4)Br</chem>                |                                                                                       |
| 2,2,6,7-Tetramethyl-10-oxatricyclo[4.3.1.0(1,6)]decan-5-ol                                                             | 536541  |    |    |
|                                                                                                                        |         | <chem>CC1(CCC(C2(C13CCC2(O3)C)C)O)C</chem>                                           |                                                                                       |
| 3,7,11,15-Tetramethyl-2-hexadecen-1-ol                                                                                 | 5366244 |   |   |
|                                                                                                                        |         | <chem>CC(C)CCCC(C)CCCC(C)CCC/C(=C/CO)/C</chem>                                       |                                                                                       |
| Dihydrosyringin                                                                                                        | N/A     |  |  |
|                                                                                                                        |         | <chem>COC1=CC(CCCO)=CC(OC)=C1O</chem>                                                |                                                                                       |
| Cyclopropanebutanoic acid, 2-[[[2-[[[2-(2-pentylcyclopropyl)methyl]cyclopropyl]methyl]cyclopropyl]methyl]-methyl ester | 554084  |  |  |
|                                                                                                                        |         | <chem>CCCCC1CC1CC2CC2CC3CC3CC4CC4CCCC(=O)OC</chem>                                   |                                                                                       |

|                                                                                |         |                                                                                                                                         |                                                                                       |
|--------------------------------------------------------------------------------|---------|-----------------------------------------------------------------------------------------------------------------------------------------|---------------------------------------------------------------------------------------|
| Pentadecanoic acid,<br>14-methyl-, methyl<br>ester                             | 21205   | <br><chem>CC(C)CCCCCCCCCCCCC(=O)OC</chem>             |    |
| n-Hexadecanoic acid                                                            | 985     | <br><chem>CCCCCCCCCCCCCCCC(=O)O</chem>                |    |
| 1-(4,5-dimethoxy-2-nitrophenyl)ethan-1-ol                                      | 2754046 | <br><chem>CC(C1=CC(=C(C=C1[N+](=O)[O-])OC)OC)O</chem> |    |
| Scopoletin                                                                     | 5280460 | <br><chem>COC1=C(C=C2C(=C1)C=CC(=O)O2)O</chem>       |   |
| trans-Sinapyl alcohol                                                          | 5280507 | <br><chem>COC1=CC(=CC(=C1O)OC)/C=C/CO</chem>        |  |
| trans-Shisool                                                                  | 519954  | <br><chem>CC(=C)C1CCC(CC1)CO</chem>                 |  |
| Atis-16-ene,<br>(5 $\beta$ ,8 $\alpha$ ,9 $\beta$ ,10 $\alpha$ ,12 $\alpha$ )- | 392473  |                                                     |  |

C[C@@]12CC(=O)[C@H](C([C@H]1CC[C@]34[C@H]2C[C@H](CC3=O)C(=C)C4)(C)C)O

73

Isofraxidin

5318565

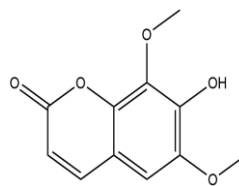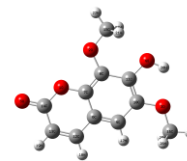

COC1=C(C(=C2C(=C1)C=CC(=O)O2)OC)O

74

Phytol

5280435

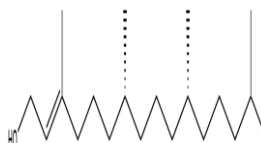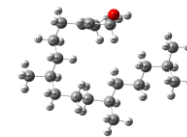

C[C@@H](CCC[C@H](C)CCC/C(=C/CO)/C)CCCC(C)C

75

Linoleic acid

5282457

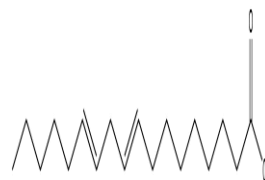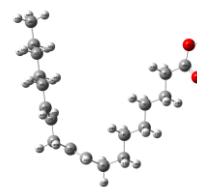

CCCCC/C=C/C/C=C/CCCCCCCC(=O)O

76

cis-Vaccenic acid

5282761

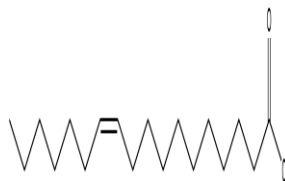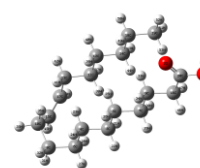

CCCCC/C=C\CCCCCCCC(=O)O

77

Octadecanoic acid

5281

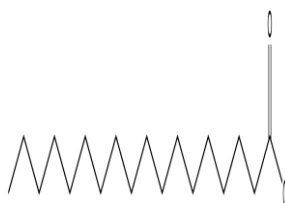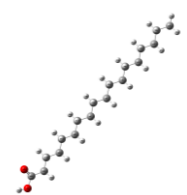

CCCCCCCCCCCCCCCC(=O)O

78

2-[(E)-4-(1,4-dihydroxy-2,2,6-trimethylcyclohexyl)but-3-en-2-yl]oxy-6-(hydroxymethyl)oxane-3,4,5-triol

16745401

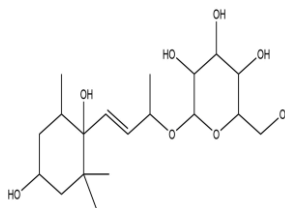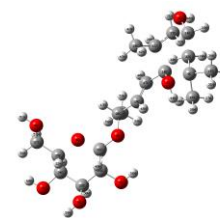

CC1CC(CC(C1/C=C/C(C)OC2C(C(C(C(O2)CO)O)O)O)(C)C)O

|                                                                                 |          |                                                                                      |                                                                                       |
|---------------------------------------------------------------------------------|----------|--------------------------------------------------------------------------------------|---------------------------------------------------------------------------------------|
| 2H-Pyran-2-one,<br>tetrahydro-6-tridecyl-                                       | 518573   | 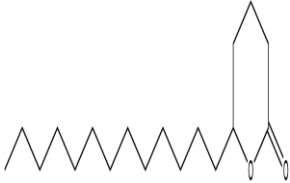   |    |
|                                                                                 |          | <chem>CCCCCCCCCCCCC1CCCC(=O)O1</chem>                                                |                                                                                       |
| s-Indacene,<br>1,2,3,5,6,7-hexahydro-<br>1,1,4,8-tetramethyl-                   | 608083   |    |    |
|                                                                                 |          | <chem>CC1=C2CCCC2=C(C3=C1CCC3(C)C)C</chem>                                           |                                                                                       |
| 1,9-<br>Dioxacyclohexadeca-<br>4,13-diene-2-10-dione,<br>7,8,15,16-tetramethyl- | 5373406  |     |    |
|                                                                                 |          | <chem>CC1C/C=C/CC(=O)OC(C/C=C/CCC(=O)OC1C)C</chem>                                   |                                                                                       |
| Triethylene glycol                                                              | 8172     |  |  |
|                                                                                 |          | <chem>C(COCCOCCO)O</chem>                                                            |                                                                                       |
| 1-Heptatriacotanol                                                              | 537071   |  |  |
|                                                                                 |          | <chem>CCCCCCCCCCCCCCCCCCCCCCCCCCCCCCCCCO</chem>                                      |                                                                                       |
| Hexadecanoic acid, 2-<br>hydroxy-1-<br>(hydroxymethyl)ethyl<br>ester            | 123409   |   |  |
|                                                                                 |          | <chem>CCCCCCCCCCCCCCCC(=O)OC(CO)CO</chem>                                            |                                                                                       |
| Phthalic acid, octyl 2-<br>propylpentyl ester                                   | 91720176 |  |  |
|                                                                                 |          | <chem>CCCCCCCCOC(=O)C1=CC=CC=C1C(=O)OCC(CCC)CCC</chem>                               |                                                                                       |

4-Hydroxybutyl  
hexadecanoate

205694

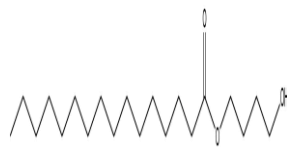
CCCCCCCCCCCCCCCC(=O)OCCCCO
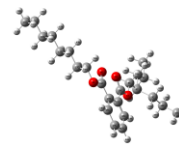

87

3-  
Hydroxypropyl hexade  
canoate

24802448

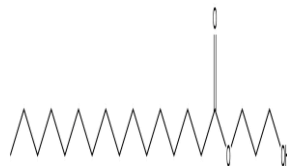
CCCCCCCCCCCCCCCC(=O)OCCCO
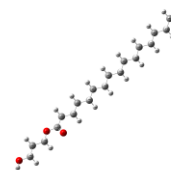

88

(E)-3,3'-Dimethoxy-  
4,4'-dihydroxystilbene

5280698

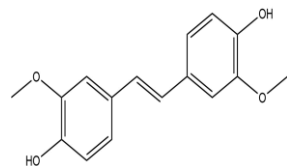
COC1=C(C=CC(=C1)/C=C/C2=CC(=C(C=C2)O)OC)O
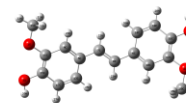

89

Oleic anhydride

5369123

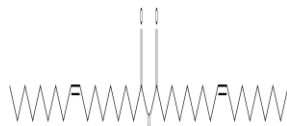
CCCCCCCC/C=C\CCCCCCCC(=O)OC(=O)CCCCCCC/C=C\CCCCCCCC
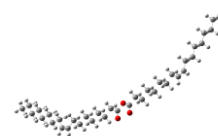

90

Octadecanoic acid, 2-  
hydroxy-1-  
(hydroxymethyl)ethyl  
ester

79075

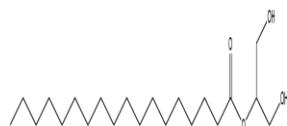
CCCCCCCCCCCCCCCC(=O)OC(CO)CO
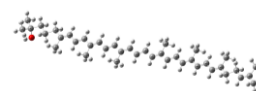

91

Phytyl decanoate

91711717

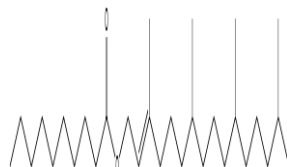
CCCCCCCCC(=O)OC/C=C(\C)/CCCC(C)CCCC(C)CCCC(C)C
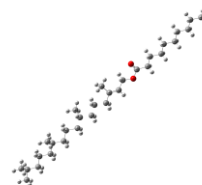

92

Phytyl heptadecanoate

N/A

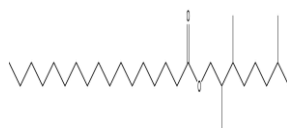
CCCCCCCCCCCCCCCC(OCC(C(CCCC(C)C)C)C)=O
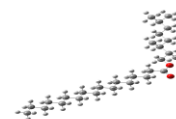



**Table ST14:** Predicted binding pockets of the target proteins identified using the PrankWeb tool.

| Protein               | PDB ID | Description |       |             |                |                                                                                                                                                                             |                            |
|-----------------------|--------|-------------|-------|-------------|----------------|-----------------------------------------------------------------------------------------------------------------------------------------------------------------------------|----------------------------|
| $\alpha$ -amylase     | 2QV4   | Rank        | Score | Probability | No of Residues | Residues                                                                                                                                                                    | Average conservation score |
|                       |        | 1           | 38.70 | 0.95        | 23             | 51, 53, 59, 62, 63, 151, 162, 163, 165, 197, 198, 200, 201, 233, 235, 240, 299, 300, 305, 306, 307, 356, 357                                                                | 1.70                       |
|                       |        | 2           | 1.37  | 0.01        | 8              | 318, 322, 377, 383, 387, 388, 389, 390                                                                                                                                      | 0                          |
| $\alpha$ -glucosidase | 3A4A   | 1           | 25.67 | 0.88        | 35             | 69, 72, 112, 156, 157, 158, 159, 160, 178, 215, 216, 240, 241, 242, 277, 279, 280, 301, 303, 307, 310, 311, 312, 313, 314, 315, 316, 350, 351, 352, 353, 411, 415, 442, 446 | 0.24                       |
|                       |        | 2           | 4.84  | 0.22        | 19             | 8, 11, 13, 15, 16, 259, 262, 263, 271, 272, 274, 290, 292, 295, 296, 297, 298, 341, 343                                                                                     | 0                          |
|                       |        | 3           | 3.45  | 0.13        | 13             | 156, 161, 233, 235, 236, 314, 317, 415, 418, 419, 422, 423, 429                                                                                                             | 0                          |
|                       |        | 4           | 1.98  | 0.04        | 9              | 95, 98, 101, 102, 103, 208, 210, 268, 270                                                                                                                                   | 1.22                       |
|                       |        | 5           | 1.28  | 0.01        | 9              | 58, 213, 301, 303, 347, 350, 351, 352, 353                                                                                                                                  | 0.25                       |

**Table ST15:** Results of molecular docking of shortlisted GC–MS-identified compounds from the methanolic extract of *H. fomes* leaves (MEHFL) against both target proteins.

| Protein              | Compound | Docking score (kcal/mol) | Number of hydrogen bond |
|----------------------|----------|--------------------------|-------------------------|
| $\alpha$ amylase     | 17       | -10.4                    | 6                       |
|                      | 61       | -9.9                     | 2                       |
|                      | 72       | -9                       | 0                       |
|                      | 30       | -8.9                     | 2                       |
|                      | 81       | -8.6                     | 0                       |
|                      | 94       | -8.3                     | 2                       |
|                      | 97       | -8.1                     | 1                       |
|                      | 80       | -7.8                     | 0                       |
|                      | 88       | -7.8                     | 2                       |
|                      | Control  | -7.8                     | 8                       |
| $\alpha$ glucosidase | 17       | -10.5                    | 8                       |
|                      | 61       | -9.4                     | 2                       |
|                      | 94       | -9.3                     | 2                       |
|                      | 72       | -9                       | 1                       |
|                      | 78       | -8.8                     | 5                       |
|                      | 81       | -8.5                     | 1                       |
|                      | 95       | -8.5                     | 0                       |
|                      | Control  | -8.0                     | 18                      |

**Table ST16:** Non-bond interaction profiles of the shortlisted GC–MS-guided compounds from the methanolic extract of *H. fomes* leaves (MEHFL) with  $\alpha$ -amylase and  $\alpha$  glucosidase.

| Protein           | Compound | Residue | Distance | Category              | Types                                         |                            |
|-------------------|----------|---------|----------|-----------------------|-----------------------------------------------|----------------------------|
| $\alpha$ -amylase | 17       | ALA106  | 2.81     | Hydrogen Bond;Halogen | Conventional Hydrogen Bond;Halogen (Fluorine) |                            |
|                   |          | HIS299  | 2.44     | Hydrogen Bond         | Conventional Hydrogen Bond                    |                            |
|                   |          | ASP300  | 2.38     | Hydrogen Bond         | Conventional Hydrogen Bond                    |                            |
|                   |          | ASP300  | 2.52     | Hydrogen Bond         | Conventional Hydrogen Bond                    |                            |
|                   |          | ASP197  | 2.40     | Hydrogen Bond         | Conventional Hydrogen Bond                    |                            |
|                   |          | HIS305  | 3.55     | Hydrogen Bond         | Carbon Hydrogen Bond                          |                            |
|                   |          | GLY104  | 3.56     | Halogen               | Halogen (Fluorine)                            |                            |
|                   |          | TRP59   | 4.36     | Hydrophobic           | Pi-Pi Stacked                                 |                            |
|                   |          | TRP59   | 4.01     | Hydrophobic           | Pi-Pi Stacked                                 |                            |
|                   |          | ALA106  | 4.64     | Hydrophobic           | Alkyl                                         |                            |
|                   |          | PRO54   | 4.63     | Hydrophobic           | Alkyl                                         |                            |
|                   |          | TRP59   | 5.05     | Hydrophobic           | Pi-Alkyl                                      |                            |
|                   |          | TRP59   | 5.19     | Hydrophobic           | Pi-Alkyl                                      |                            |
|                   |          | TRP59   | 4.55     | Hydrophobic           | Pi-Alkyl                                      |                            |
|                   |          | 30      | GLU233   | 2.71                  | Hydrogen Bond                                 | Conventional Hydrogen Bond |
|                   |          | ASP197  | 2.73     | Hydrogen Bond         | Conventional Hydrogen Bond                    |                            |
|                   |          | ILE235  | 3.58     | Hydrophobic           | Pi-Sigma                                      |                            |

|                       |         |        |      |               |                            |
|-----------------------|---------|--------|------|---------------|----------------------------|
|                       |         | TYR62  | 4.30 | Hydrophobic   | Pi-Pi Stacked              |
|                       |         | HIS201 | 4.39 | Hydrophobic   | Pi-Pi T-shaped             |
|                       |         | ILE235 | 4.85 | Hydrophobic   | Alkyl                      |
|                       |         | TYR151 | 5.06 | Hydrophobic   | Pi-Alkyl                   |
|                       |         | HIS201 | 4.98 | Hydrophobic   | Pi-Alkyl                   |
|                       |         | ALA198 | 5.32 | Hydrophobic   | Pi-Alkyl                   |
|                       |         | LYS200 | 4.77 | Hydrophobic   | Pi-Alkyl                   |
|                       | 61      | GLN63  | 2.46 | Hydrogen Bond | Conventional Hydrogen Bond |
|                       |         | GLN63  | 2.21 | Hydrogen Bond | Conventional Hydrogen Bond |
|                       |         | GLU233 | 3.30 | Halogen       | Halogen (Cl, Br, I)        |
|                       |         | ASP300 | 3.89 | Electrostatic | Pi-Anion                   |
|                       |         | TRP59  | 4.15 | Hydrophobic   | Pi-Pi Stacked              |
|                       |         | TRP59  | 4.51 | Hydrophobic   | Pi-Pi Stacked              |
|                       |         | TRP59  | 3.94 | Hydrophobic   | Pi-Pi Stacked              |
|                       |         | TRP59  | 3.72 | Hydrophobic   | Pi-Pi Stacked              |
|                       |         | TYR62  | 4.50 | Hydrophobic   | Pi-Pi Stacked              |
|                       |         | ALA198 | 4.19 | Hydrophobic   | Alkyl                      |
|                       |         | TRP59  | 5.30 | Hydrophobic   | Pi-Alkyl                   |
|                       | 88      | GLN63  | 2.25 | Hydrogen Bond | Conventional Hydrogen Bond |
|                       |         | ASP197 | 2.45 | Hydrogen Bond | Conventional Hydrogen Bond |
|                       |         | ASP300 | 3.33 | Electrostatic | Pi-Anion                   |
|                       |         | TRP59  | 4.15 | Hydrophobic   | Pi-Pi Stacked              |
|                       |         | TRP59  | 4.13 | Hydrophobic   | Pi-Pi Stacked              |
|                       |         | TYR62  | 4.85 | Hydrophobic   | Pi-Pi T-shaped             |
|                       |         | LEU162 | 5.20 | Hydrophobic   | Alkyl                      |
|                       |         | LEU165 | 4.74 | Hydrophobic   | Alkyl                      |
|                       | 94      | GLN63  | 1.93 | Hydrogen Bond | Conventional Hydrogen Bond |
|                       |         | LEU162 | 4.64 | Hydrophobic   | Alkyl                      |
|                       |         | LEU162 | 4.73 | Hydrophobic   | Alkyl                      |
|                       |         | LEU165 | 4.90 | Hydrophobic   | Alkyl                      |
|                       |         | ALA198 | 4.82 | Hydrophobic   | Alkyl                      |
|                       |         | LEU165 | 5.36 | Hydrophobic   | Alkyl                      |
|                       |         | TRP59  | 5.20 | Hydrophobic   | Pi-Alkyl                   |
|                       |         | TRP59  | 5.08 | Hydrophobic   | Pi-Alkyl                   |
|                       | Control | ALA106 | 2.10 | Hydrogen Bond | Conventional Hydrogen Bond |
|                       |         | ASP300 | 2.07 | Hydrogen Bond | Conventional Hydrogen Bond |
|                       |         | GLU233 | 2.49 | Hydrogen Bond | Conventional Hydrogen Bond |
|                       |         | GLU233 | 2.61 | Hydrogen Bond | Conventional Hydrogen Bond |
|                       |         | GLN63  | 2.37 | Hydrogen Bond | Conventional Hydrogen Bond |
|                       |         | GLY164 | 3.00 | Hydrogen Bond | Conventional Hydrogen Bond |
|                       |         | AIS305 | 5.33 | Hydrophobic   | Pi-Alkyl                   |
| $\alpha$ -glucosidase | 17      | THR310 | 2.71 | Hydrogen Bond | Conventional Hydrogen Bond |
|                       |         | ASP242 | 2.05 | Hydrogen Bond | Conventional Hydrogen Bond |
|                       |         | TYR158 | 2.37 | Hydrogen Bond | Conventional Hydrogen Bond |
|                       |         | PRO312 | 2.99 | Hydrogen Bond | Conventional Hydrogen Bond |
|                       |         | GLU411 | 2.68 | Hydrogen Bond | Conventional Hydrogen Bond |

|         |            |      |               |                            |
|---------|------------|------|---------------|----------------------------|
|         | ASP242     | 3.52 | Hydrogen Bond | Carbon Hydrogen Bond       |
|         | ASP307     | 4.71 | Electrostatic | Pi-Anion                   |
|         | VAL232     | 5.46 | Hydrophobic   | Alkyl                      |
|         | TYR158     | 4.38 | Hydrophobic   | Pi-Alkyl                   |
|         | HIS280     | 4.79 | Hydrophobic   | Pi-Alkyl                   |
| 61      | ARG315     | 2.14 | Hydrogen Bond | Conventional Hydrogen Bond |
|         | ASP307     | 2.46 | Hydrogen Bond | Conventional Hydrogen Bond |
|         | ASP307     | 3.85 | Electrostatic | Pi-Anion                   |
|         | TYR158     | 5.25 | Hydrophobic   | Pi-Pi T-shaped             |
|         | SER311,    |      |               |                            |
|         | PRO312     | 4.24 | Hydrophobic   | Amide-Pi Stacked           |
|         | TYR158     | 5.12 | Hydrophobic   | Pi-Alkyl                   |
|         | PHE159     | 4.60 | Hydrophobic   | Pi-Alkyl                   |
|         | ARG315     | 4.45 | Hydrophobic   | Pi-Alkyl                   |
|         | PRO312     | 4.18 | Hydrophobic   | Pi-Alkyl                   |
| 78      | ARG315     | 2.96 | Hydrogen Bond | Conventional Hydrogen Bond |
|         | ARG315     | 3.04 | Hydrogen Bond | Conventional Hydrogen Bond |
|         | GLN353     | 2.05 | Hydrogen Bond | Conventional Hydrogen Bond |
|         | LEU313     | 1.88 | Hydrogen Bond | Conventional Hydrogen Bond |
|         | TYR158     | 2.61 | Hydrogen Bond | Conventional Hydrogen Bond |
|         | TYR158     | 3.56 | Hydrophobic   | Pi-Sigma                   |
|         | LYS156     | 5.27 | Hydrophobic   | Alkyl                      |
|         | LYS156     | 3.86 | Hydrophobic   | Alkyl                      |
|         | ARG315     | 4.45 | Hydrophobic   | Alkyl                      |
|         | TYR158     | 5.11 | Hydrophobic   | Pi-Alkyl                   |
|         | HIS280     | 4.85 | Hydrophobic   | Pi-Alkyl                   |
|         | PHE314     | 5.10 | Hydrophobic   | Pi-Alkyl                   |
| 94      | ARG315     | 2.56 | Hydrogen Bond | Conventional Hydrogen Bond |
|         | ASP307     | 3.07 | Hydrogen Bond | Conventional Hydrogen Bond |
|         | TYR72      | 3.74 | Hydrophobic   | Pi-Sigma                   |
|         | VAL216     | 5.46 | Hydrophobic   | Alkyl                      |
|         | ARG315     | 4.17 | Hydrophobic   | Alkyl                      |
|         | TYR158     | 5.10 | Hydrophobic   | Pi-Alkyl                   |
|         | TYR158     | 5.01 | Hydrophobic   | Pi-Alkyl                   |
|         | PHE159     | 5.37 | Hydrophobic   | Pi-Alkyl                   |
|         | PHE178     | 5.09 | Hydrophobic   | Pi-Alkyl                   |
| Control | SER240     | 2.18 | Hydrogen Bond | Conventional Hydrogen Bond |
|         | GLN279     | 2.90 | Hydrogen Bond | Conventional Hydrogen Bond |
|         | ARG315     | 2.83 | Hydrogen Bond | Conventional Hydrogen Bond |
|         | ARG315     | 2.57 | Hydrogen Bond | Conventional Hydrogen Bond |
|         | ARG315     | 2.82 | Hydrogen Bond | Conventional Hydrogen Bond |
|         | ASP242:OD2 | 1.96 | Hydrogen Bond | Conventional Hydrogen Bond |
|         | ASP242:OD2 | 2.65 | Hydrogen Bond | Conventional Hydrogen Bond |
|         | PRO312     | 2.48 | Hydrogen Bond | Conventional Hydrogen Bond |
|         | HIS280     | 2.43 | Hydrogen Bond | Conventional Hydrogen Bond |

---

|        |      |               |                            |
|--------|------|---------------|----------------------------|
| GLU411 | 2.55 | Hydrogen Bond | Conventional Hydrogen Bond |
| GLN353 | 2.66 | Hydrogen Bond | Conventional Hydrogen Bond |
| ASP352 | 2.60 | Hydrogen Bond | Conventional Hydrogen Bond |
| GLN353 | 2.17 | Hydrogen Bond | Conventional Hydrogen Bond |
| GLU277 | 2.61 | Hydrogen Bond | Conventional Hydrogen Bond |
| ARG315 | 3.40 | Hydrogen Bond | Carbon Hydrogen Bond       |

---

**Table ST17:** Comprehensive ADMET profile of shortlisted GC–MS identified compounds from the methanolic extract of *H. fomes* leaves (MEHFL).

| Compound        | Absorption |          |      |     |     | Distribution |       |       |      |         | Metabolism |          |          |         |         |         |         |         | Excretion |         |         | Toxicity |      |      |                  |          |          |          |          |          |
|-----------------|------------|----------|------|-----|-----|--------------|-------|-------|------|---------|------------|----------|----------|---------|---------|---------|---------|---------|-----------|---------|---------|----------|------|------|------------------|----------|----------|----------|----------|----------|
|                 | HOB20%     | HOB50%   | HIA  | PGI | PGS | BBB          | FU    | PPB   | VDss | CYP1A2I | CYP1A2S    | CYP2C19I | CYP2C19S | CYP2C9I | CYP2C9S | CYP2D6I | CYP2D6S | CYP3A4I | CYP3A4S   | OATP1B1 | OATP1B3 | Cl       | OCT2 | HL   | LD <sub>50</sub> | TC       | Hep      | Car      | Mut      | Cyt      |
| 17              | B (0.77)   | B (0.66) | 0.76 | I   | S   | 0.21         | 14.31 | 88.93 | 1.49 | NI      | NS         | I        | NS       | I       | S       | NI      | NS      | NI      | NS        | I       | NI      | 4.43     | NI   | <3   | 2500             | 5        | Active   | Inactive | Active   | Inactive |
| 30              | B (0.85)   | B (0.71) | 0.98 | NI  | NS  | 0.94         | 2.49  | 96.79 | 0.72 | I       | NS         | I        | S        | I       | NI      | NS      | NI      | NS      | NI        | NI      | 7.38    | NI       | <3   | 900  | 4                | Active   | Inactive | Inactive | Inactive |          |
| 61              | B (0.82)   | B (0.68) | 0.99 | I   | NS  | 0.61         | 0.61  | 99.35 | 0.72 | I       | S          | I        | NS       | I       | NI      | NS      | I       | NS      | S         | NI      | NI      | 1.31     | NI   | <3   | 340              | 4        | Inactive | Inactive | Inactive | Inactive |
| 78              | B (0.76)   | NB(0.18) | 0.62 | NI  | NS  | 0.13         | 54.31 | 64.13 | 0.25 | NI      | NS         | NI       | NS       | NI      | NI      | NS      | NI      | NS      | NI        | NI      | 1.56    | NI       | ≥3   | 2000 | 4                | Inactive | Inactive | Inactive | Inactive |          |
| 88              | B (0.63)   | B (0.57) | 0.98 | NI  | NS  | 0.21         | 1.47  | 99.07 | 0.84 | I       | NS         | NI       | NS       | NI      | S       | NI      | NS      | NI      | NS        | NI      | NI      | 12.87    | NI   | <3   | 1560             | 4        | Inactive | Inactive | Inactive | Inactive |
| 94              | B (0.72)   | B (0.72) | 0.98 | I   | NS  | 0.24         | 17.12 | 59.46 | 0.87 | I       | NS         | NI       | NS       | NI      | NS      | NI      | NS      | S       | NI        | NI      | 2.67    | NI       | <3   | 41   | 2                | Inactive | Inactive | Inactive | Inactive |          |
| Co<br>nit<br>ol | NB(0.02)   | NB(0.03) | 0.0  | NI  | NS  | 0.33         | 61.30 | 18.60 | 0.47 | NI      | NS         | NI       | NS       | NI      | NS      | NI      | NS      | NI      | NS        | NI      | NI      | 0.68     | NI   | ≥3   | 2000             | 4        | Active   | Inactive | Inactive | Inactive |

Abbreviation: HOB20%: Human oral bioavailability 20% (Probability), HOB50%: Human oral bioavailability 50% (Probability), HIA: Human Intestinal Absorption, PGI: P-glycoprotein inhibitor, PGS: P-glycoprotein substrate, BBB: Blood-Brain barrier (Probability), FU: Fraction unbound (Human) (Percentage), PPB: Plasma protein binding (Percentage), VDss: Steady state volume of distribution (Log VDss), CYP1A2I: CYP 1A2 Inhibitor, CYP1A2S: CYP 1A2 Substrate, CYP2C19I: CYP 2C19 Inhibitor, CYP2C19S: CYP 2C19 Substrate, CYP2C9I: CYP 2C9 Inhibitor, CYP2C9S: CYP 2C9 Substrate, CYP2D6I: CYP 2D6 Inhibitor, CYP2D6S: CYP 2D6 Substrate, CYP3A4I: CYP 3A4 Inhibitor, CYP3A4S: CYP 3A4 Substrate, OATP1B1, OATP1B3, Cl: Clearance (ml/min/kg), OCT2: Organic cation transporter 2, HL: Half-life (hr), LD<sub>50</sub>: LD<sub>50</sub> (mg/kg), TC: Toxicity Class, Hep: Hepatotoxicity, Car: Carcinogenicity, Mut: Mutagenicity, Cyt: Cytotoxicity, B: Bioavailable, NB: Non-Bioavailable, NI: Non-Inhibitor, NS: Non-Substrate, I: Inhibitor, S: Substrate

**Table ST18:** Predicted passive permeability profiles of shortlisted GC–MS identified compounds from the methanolic extract of *H. fomes* leaves (MEHFL) obtained using the PerMM web tool.

| Name    | Calculated parameters                       | Results        |
|---------|---------------------------------------------|----------------|
| 17      | Free energy of binding (DOPC)               | -2.84 kcal/mol |
|         | Log of perm. coeff. – BLM                   | -9.02          |
|         | Log of perm. coeff – BBB (Po)               | -6.08          |
|         | Log of perm. coeff – CaCO <sub>2</sub> (Po) | -5.79          |
|         | Log of perm. coeff – PAMPA–DS (Po)          | -9.55          |
| 30      | Free energy of binding (DOPC)               | -5.01 kcal/mol |
|         | Log of perm. coeff. – BLM                   | 1.60           |
|         | Log of perm. coeff – BBB (Po)               | -2.33          |
|         | Log of perm. coeff – CaCO <sub>2</sub> (Po) | -3.07          |
| 61      | Free energy of binding (DOPC)               | -6.19 kcal/mol |
|         | Log of perm. coeff. – BLM                   | -0.40          |
|         | Log of perm. coeff – BBB (Po)               | -3.03          |
|         | Log of perm. coeff – CaCO <sub>2</sub> (Po) | -3.58          |
| 78      | Free energy of binding (DOPC)               | -3.60 kcal/mol |
|         | Log of perm. coeff. – BLM                   | -10.02         |
|         | Log of perm. coeff – BBB (Po)               | -6.43          |
|         | Log of perm. coeff – CaCO <sub>2</sub> (Po) | -6.04          |
|         | Log of perm. coeff – PAMPA–DS (Po)          | -10.48         |
| 88      | Free energy of binding (DOPC)               | -2.39 kcal/mol |
|         | Log of perm. coeff. – BLM                   | -2.87          |
|         | Log of perm. coeff – BBB (Po)               | -3.91          |
|         | Log of perm. coeff – CaCO <sub>2</sub> (Po) | -4.22          |
|         | Log of perm. coeff – PAMPA–DS (Po)          | -3.88          |
| 94      | Free energy of binding (DOPC)               | -5.12 kcal/mol |
|         | Log of perm. coeff. – BLM                   | 0.98           |
|         | Log of perm. coeff – BBB (Po)               | -2.55          |
|         | Log of perm. coeff – CaCO <sub>2</sub> (Po) | -3.23          |
| Control | Free energy of binding (DOPC)               | -3.33 kcal/mol |
|         | Log of perm. coeff. – BLM                   | -19.93         |
|         | Log of perm. coeff – BBB (Po)               | -9.93          |
|         | Log of perm. coeff – CaCO <sub>2</sub> (Po) | -8.58          |
|         | Log of perm. coeff – PAMPA–DS (Po)          | -19.62         |

**Table ST19:** Predicted off targets (top 10) of the selected GC–MS identified compounds from the methanolic extract of *H. fomes* leaves (MEHFL) from SwissTargetPrediction.

| Compound                                                                          | Target                                                           | Common name          | Target Class       | Probability |
|-----------------------------------------------------------------------------------|------------------------------------------------------------------|----------------------|--------------------|-------------|
| 61                                                                                | Matrix metalloproteinase 13                                      | MMP13                | Protease           | 0.09        |
|                                                                                   | Matrix metalloproteinase 1                                       | MMP1                 | Protease           | 0.09        |
|                                                                                   |                                                                  | PSEN2 PSENEN NCSTN   |                    | 0.09        |
|                                                                                   | Gamma–secretase                                                  | APH1A PSEN1 APH1B    | Protease           |             |
|                                                                                   | Histone deacetylase 8                                            | HDAC8                | Eraser             | 0.09        |
|                                                                                   | Matrix metalloproteinase 9                                       | MMP9                 | Protease           | 0.09        |
|                                                                                   | Matrix metalloproteinase 2                                       | MMP2                 | Protease           | 0.09        |
|                                                                                   | ADAM17                                                           | ADAM17               | Protease           | 0.09        |
|                                                                                   | Nuclear receptor ROR–gamma                                       | RORC                 | Nuclear receptor   | 0.09        |
|                                                                                   | PI3–kinase p110–delta subunit                                    | PIK3CD               | Enzyme             | 0.09        |
| 78                                                                                | Protein–tyrosine phosphatase 1B                                  | PTPN1                | Phosphatase        | 0.09        |
|                                                                                   |                                                                  |                      | Electrochemical    |             |
|                                                                                   | Sodium/glucose cotransporter 2                                   | SLC5A2               | transporter        | 0.11        |
|                                                                                   |                                                                  |                      | Family A G         | 0.11        |
|                                                                                   |                                                                  |                      | protein–coupled    |             |
|                                                                                   | Adenosine A1 receptor (by homology)                              | ADORA1               | receptor           |             |
|                                                                                   | Protein–tyrosine phosphatase 1B                                  | PTPN1                | Phosphatase        | 0.11        |
|                                                                                   | Tyrosinase                                                       | TYR                  | Oxidoreductase     | 0.11        |
|                                                                                   | Protein phosphatase 2C beta                                      | PPM1B                | Phosphatase        | 0.11        |
|                                                                                   | Serine/threonine protein phosphatase PP1–gamma catalytic subunit | PPP1CC               | Phosphatase        | 0.11        |
| Serine/threonine protein phosphatase 2A, 56 kDa regulatory subunit, alpha isoform | PPP2R5A                                                          | Phosphatase          | 0.11               |             |
| Adenosine deaminase                                                               | ADA                                                              | Hydrolase            | 0.11               |             |
| 88                                                                                | Sodium/glucose cotransporter 1                                   | SLC5A1               | transporter        | 0.11        |
|                                                                                   |                                                                  |                      | Family A G         | 0.11        |
|                                                                                   |                                                                  |                      | protein–coupled    |             |
|                                                                                   | Adenosine A2a receptor (by homology)                             | ADORA2A              | receptor           |             |
|                                                                                   | Quinone reductase 2                                              | NQO2                 | Enzyme             | 0.26        |
|                                                                                   | Cytochrome P450 1A2                                              | CYP1A2               | Cytochrome P450    | 0.24        |
|                                                                                   | Cytochrome P450 1B1                                              | CYP1B1               | Cytochrome P450    | 0.23        |
|                                                                                   | Cytochrome P450 1A1                                              | CYP1A1               | Cytochrome P450    | 0.23        |
|                                                                                   | Cyclooxygenase–1                                                 | PTGS1                | Oxidoreductase     | 0.19        |
|                                                                                   | Tubulin beta–1 chain                                             | TUBB1                | Structural protein | 0.19        |
| Estrogen receptor alpha                                                           | ESR1                                                             | Nuclear receptor     | 0.16               |             |
| Nuclear factor NF–kappa–B p65 subunit                                             | RELA                                                             | Transcription factor | 0.14               |             |
| Cyclooxygenase–2                                                                  | PTGS2                                                            | Oxidoreductase       | 0.13               |             |
| Tubulin beta–3 chain                                                              | TUBB3                                                            | Structural protein   | 0.13               |             |

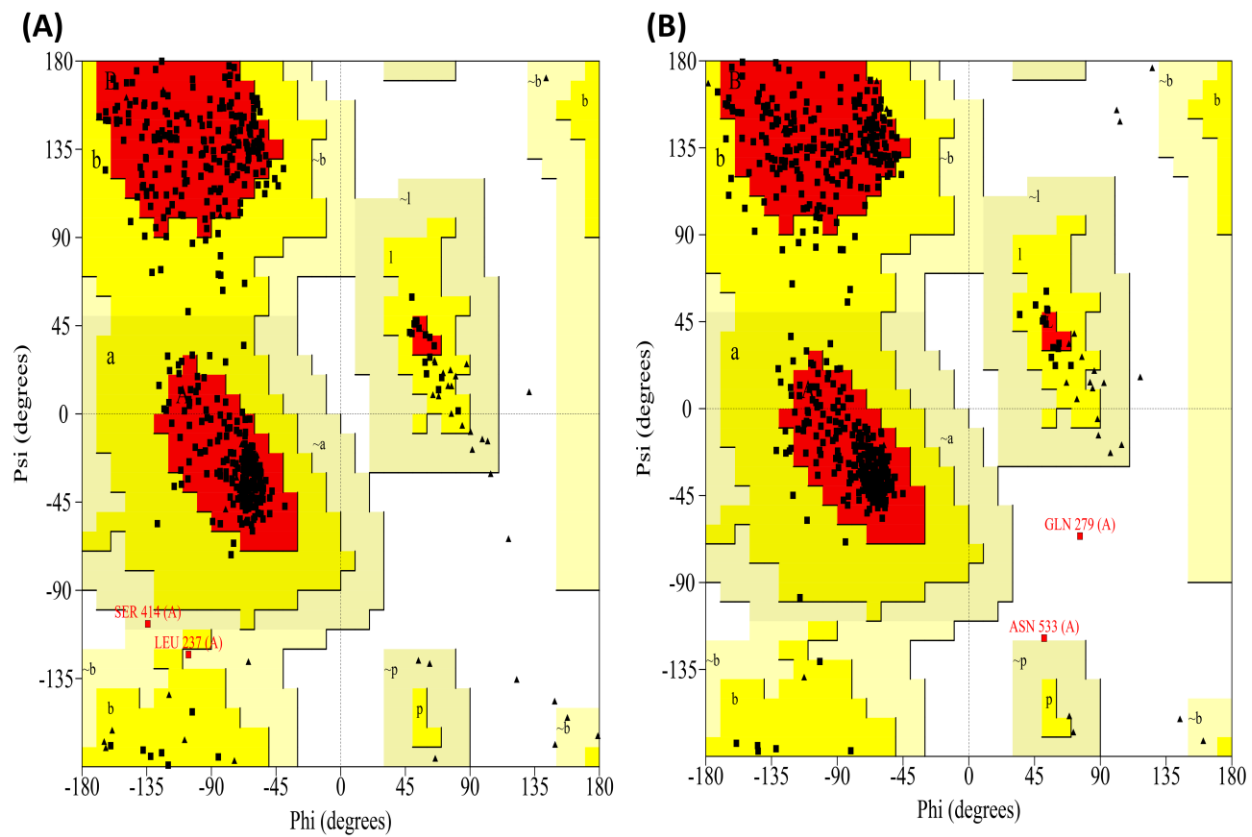

**Figure SF4:** PROCHECK Ramachandran plots of (A)  $\alpha$  amylase, (B)  $\alpha$  glucosidase.

**(A)**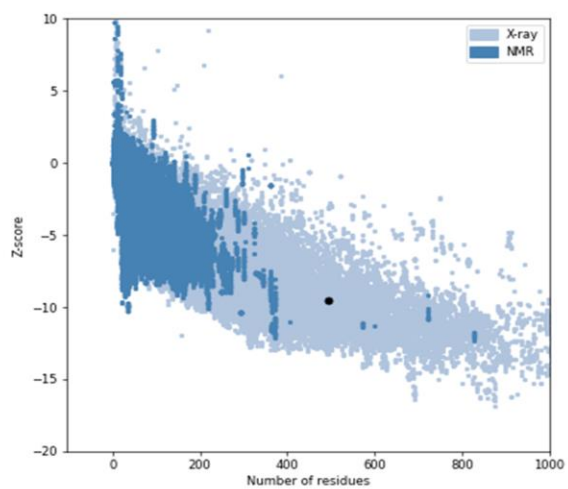**(B)**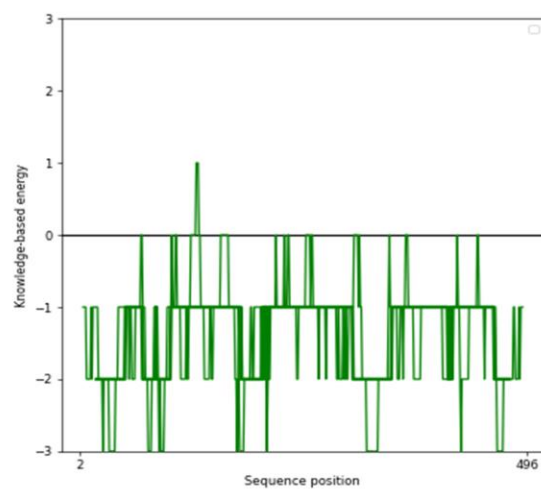**(C)**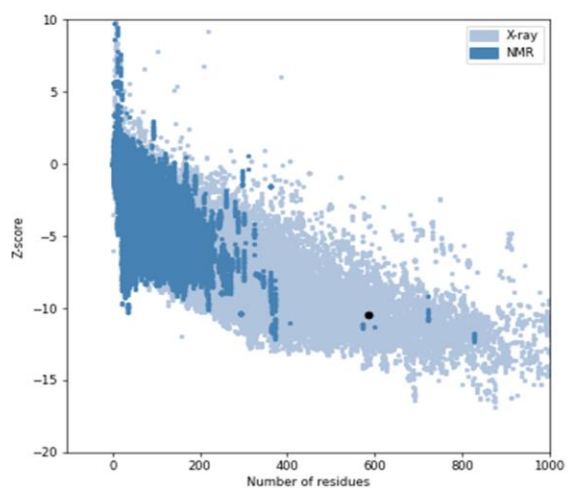**(D)**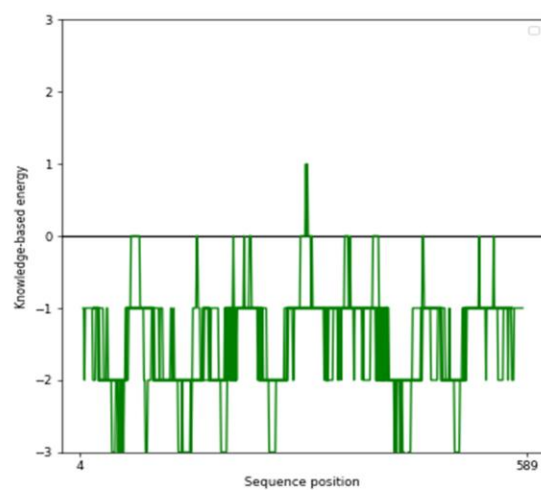

**Figure SF5:** ProSA-Web validation parameters of the target proteins. (A, B) Z scores of  $\alpha$  amylase and  $\alpha$  glucosidase within the range of experimentally determined NMR structures; (C, D) residue wise energy profiles of  $\alpha$  amylase and  $\alpha$  glucosidase, respectively.

(A)

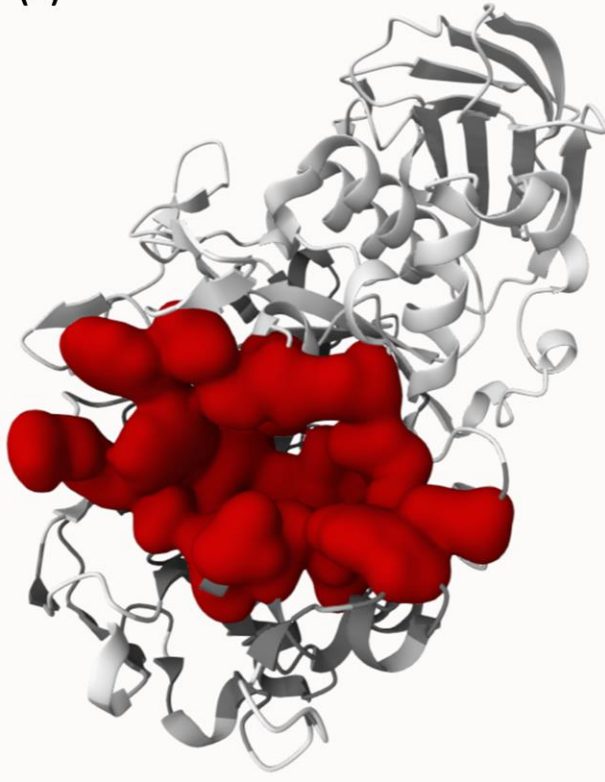

(B)

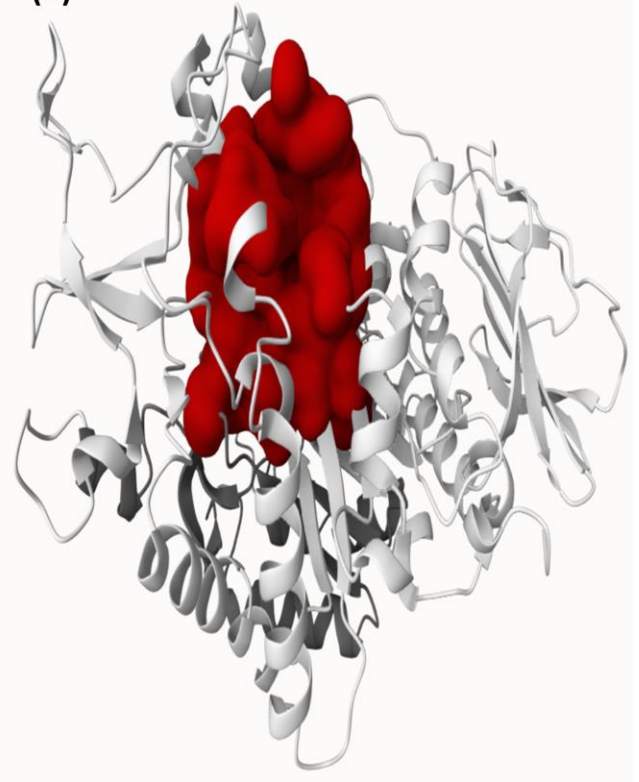

**Figure SF6:** PrankWeb predicted active site of (A)  $\alpha$  amylase, (B)  $\alpha$  glucosidase.

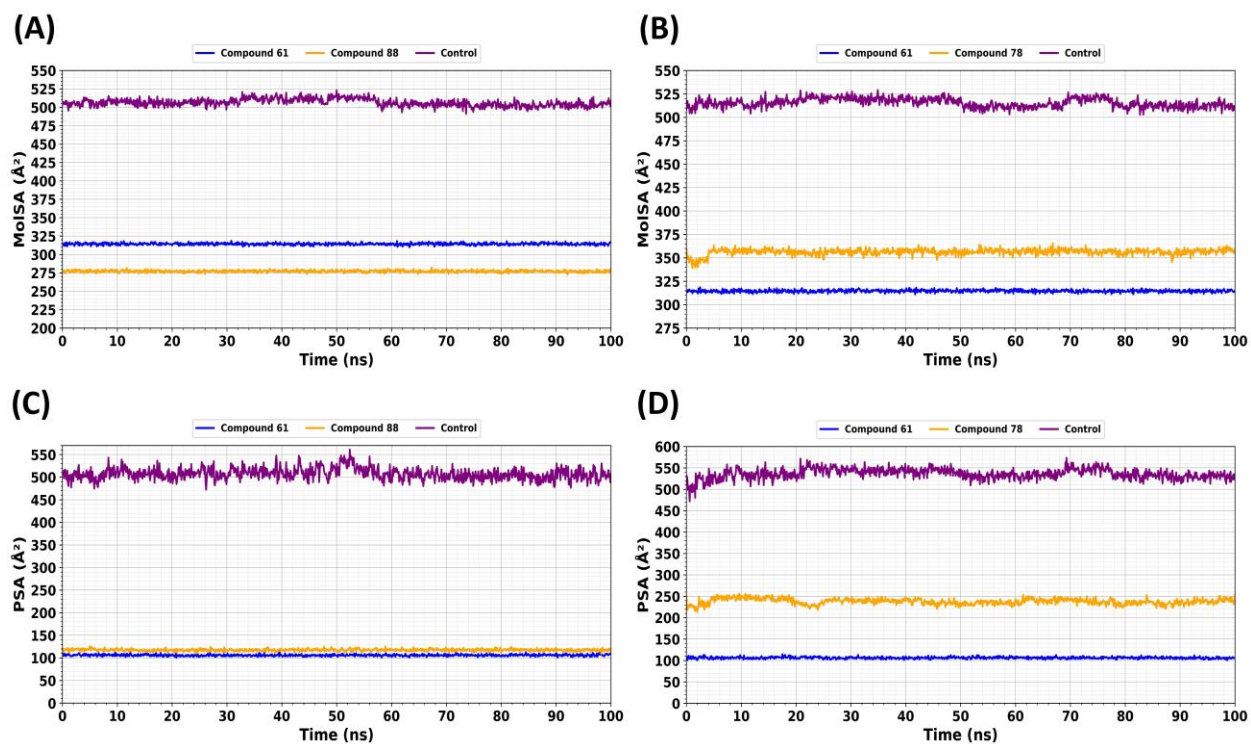

**Figure SF7:** Molecular surface area (MolSA) and polar surface area (PSA) profiles of selected GC–MS identified compounds from the methanolic extract of *H. fomes* leaves (MEHFL). (A, B) MolSA in  $\alpha$  amylase and  $\alpha$  glucosidase, respectively; (C, D) PSA in  $\alpha$  amylase and  $\alpha$  glucosidase, respectively.
